# Supplementary material for: Legionella pneumophila regulates host cell motility by targeting Phldb2 with a 14-3-3ζ-dependent protease effector
Source: eLife journal article supplement (doi:10.7554/elife.73220), 2022-02-17

Figure 1-source data 1

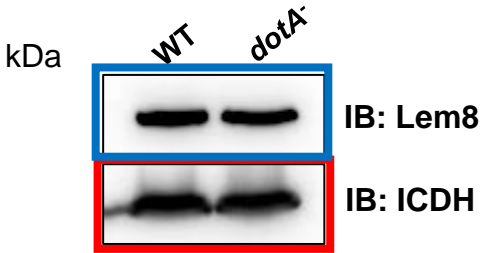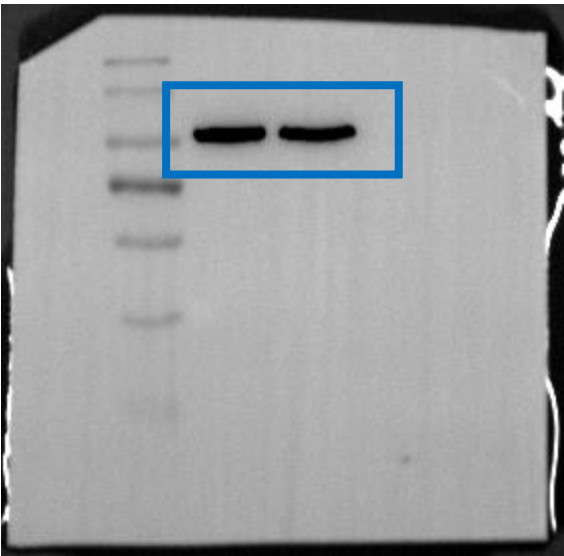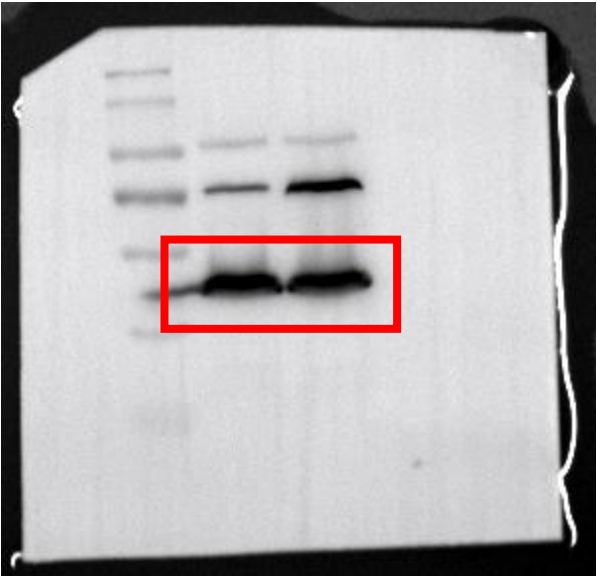

Figure 1-source data 2

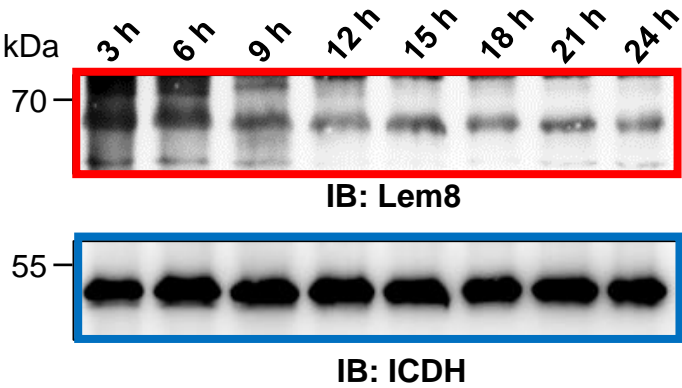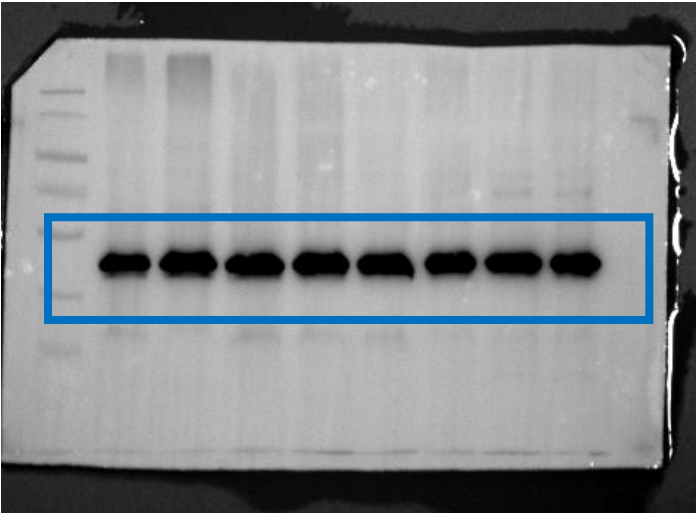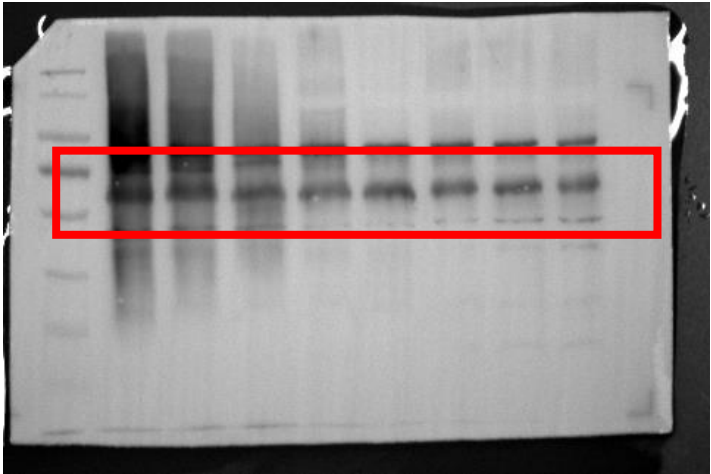

Figure 1-source data 3

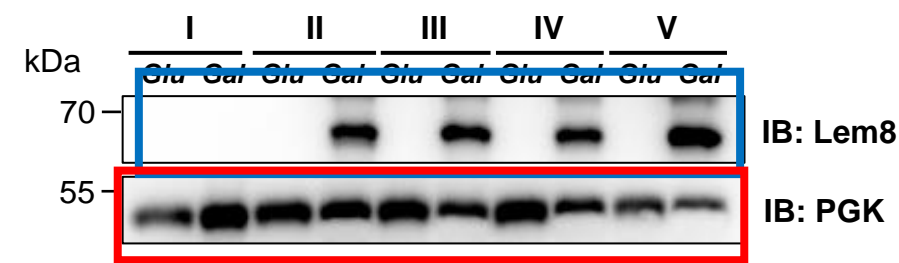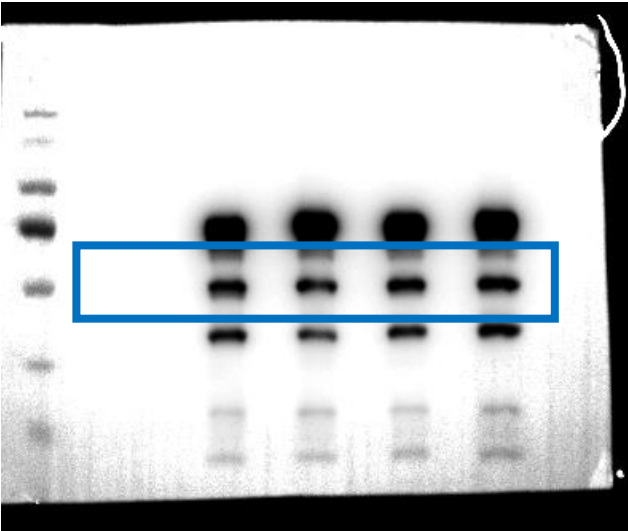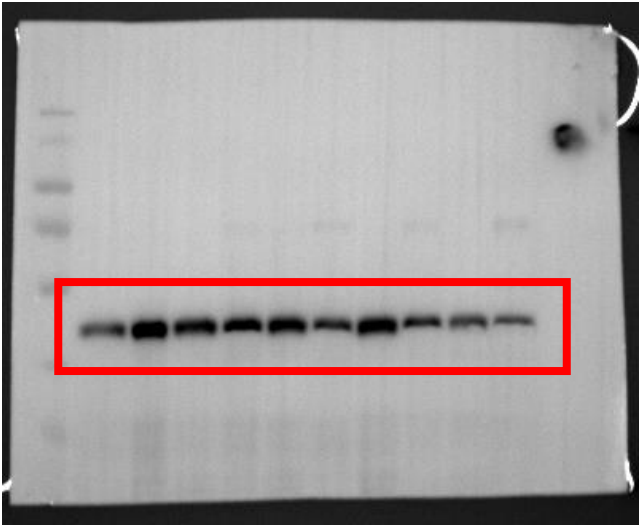

Figure 1-figure supplement 2-source data 1

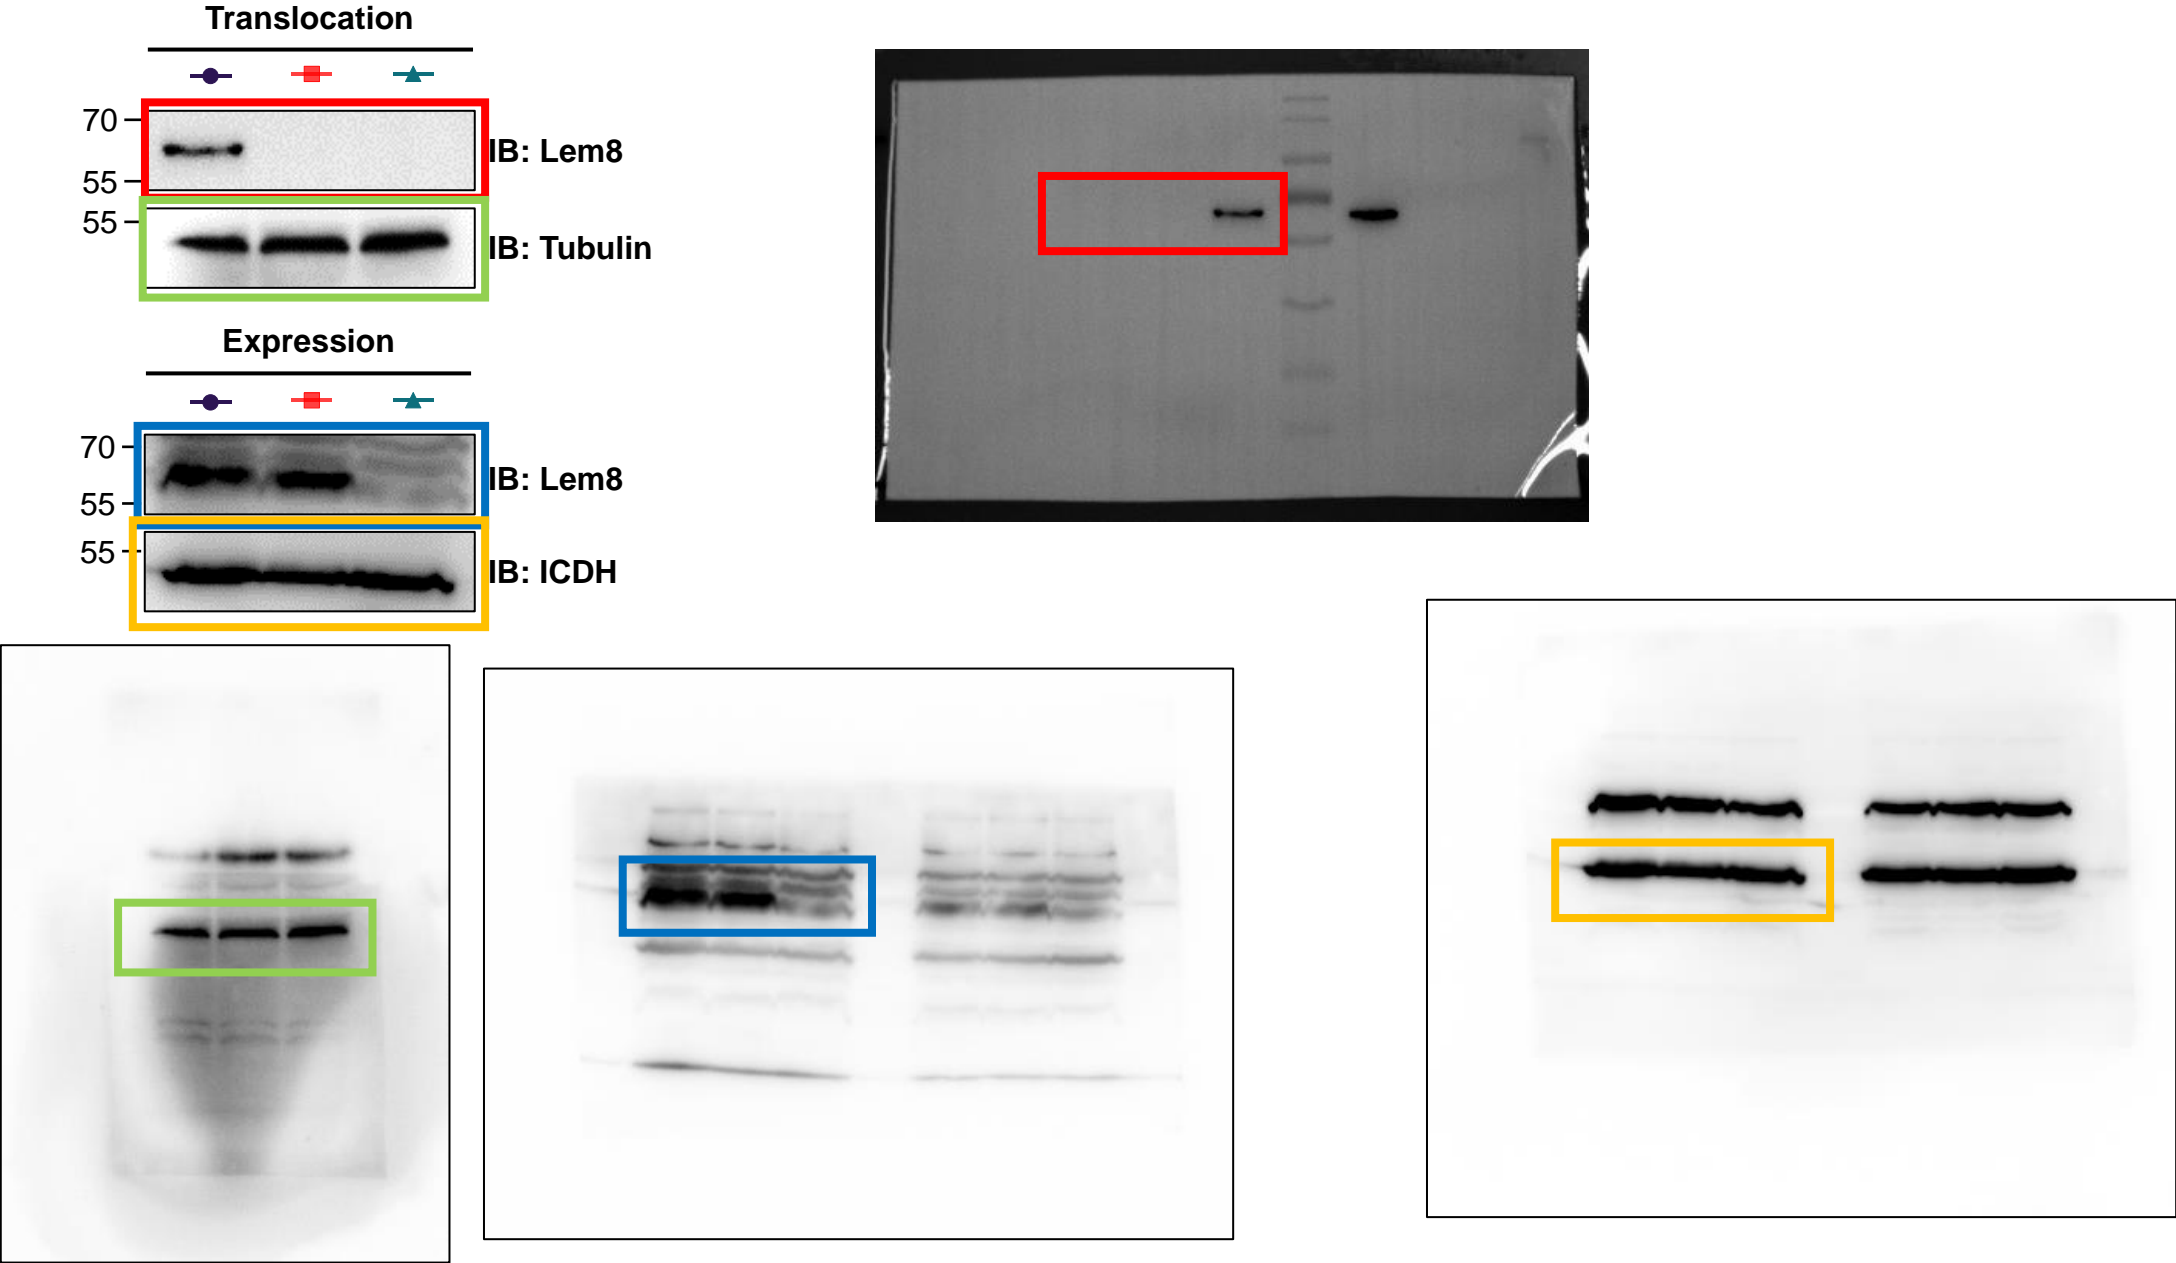

Figure 2-source data 1

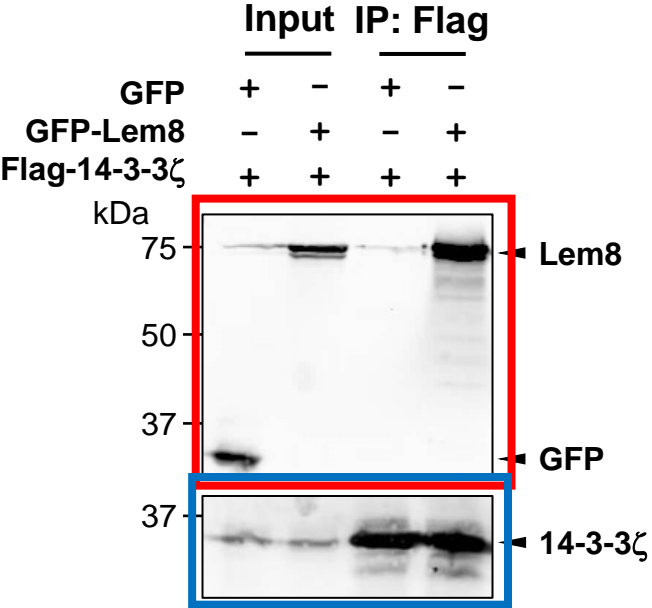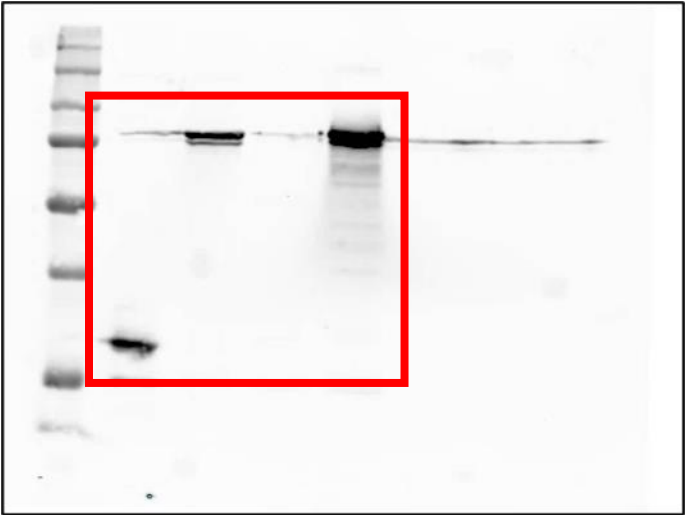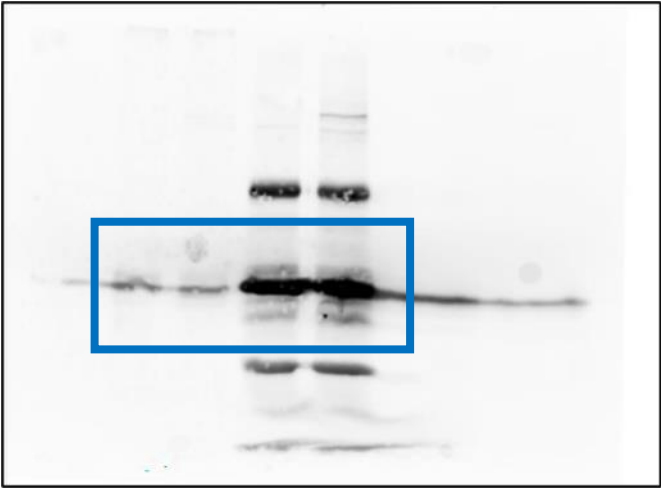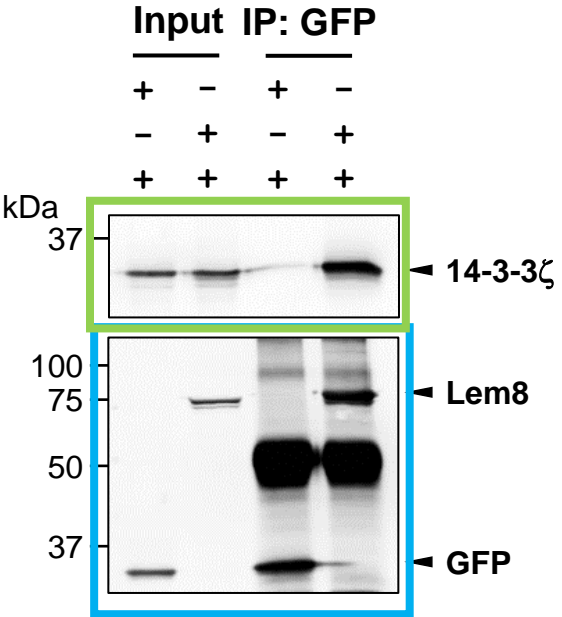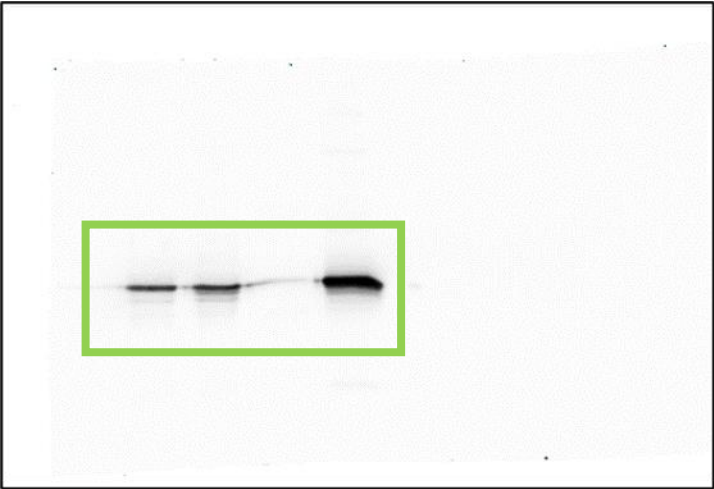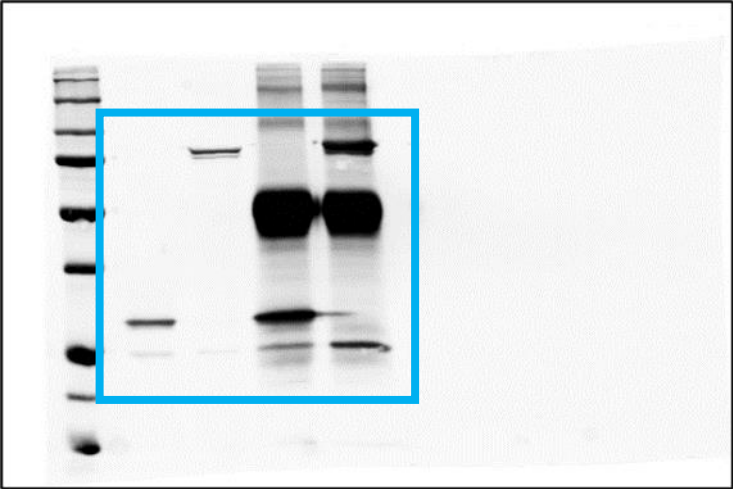

Figure 2-source data 2

C

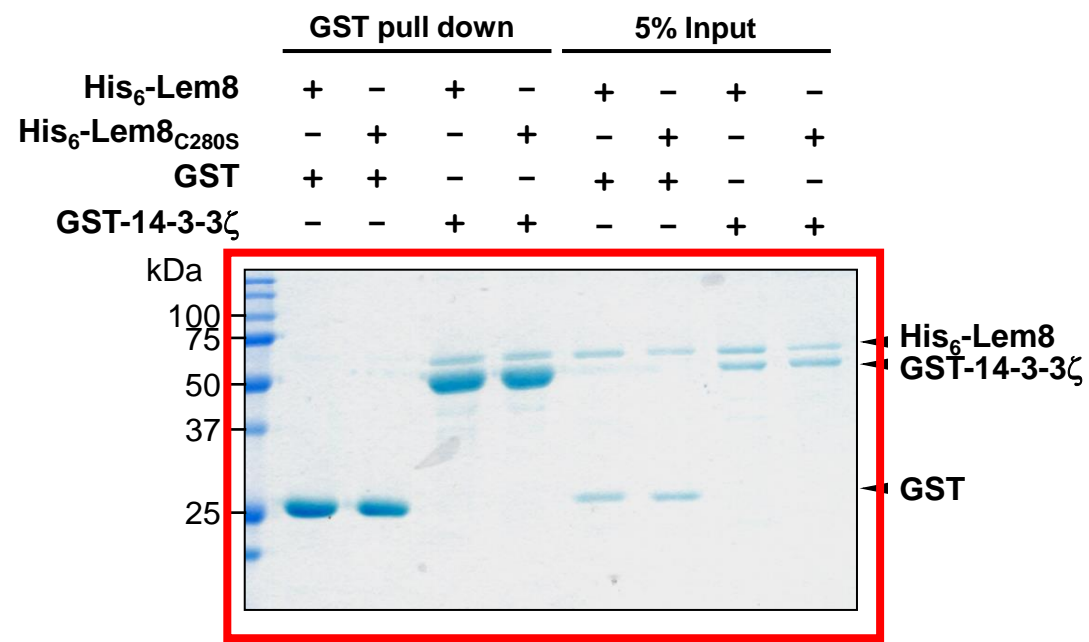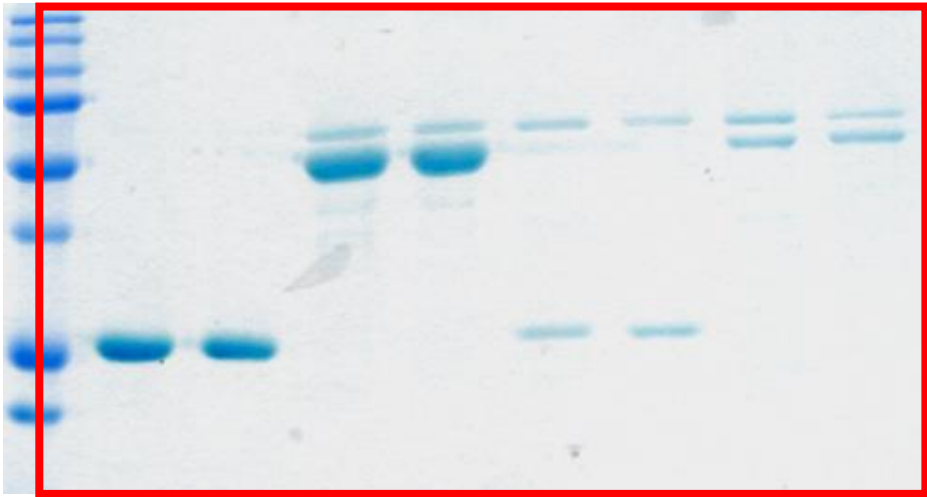

Figure 2-source data 3

D

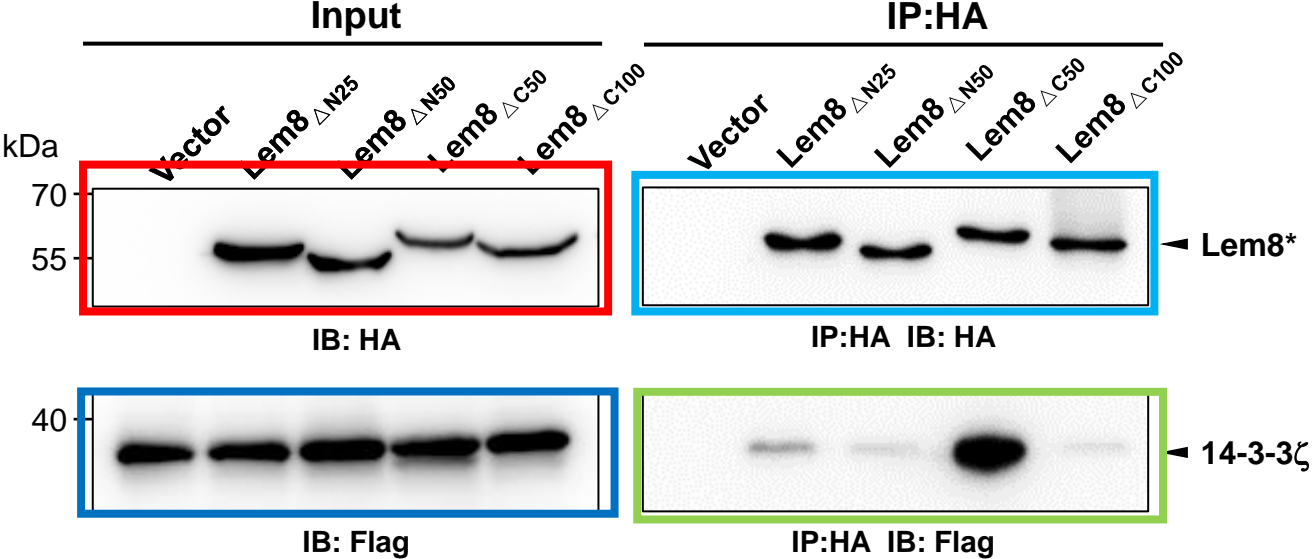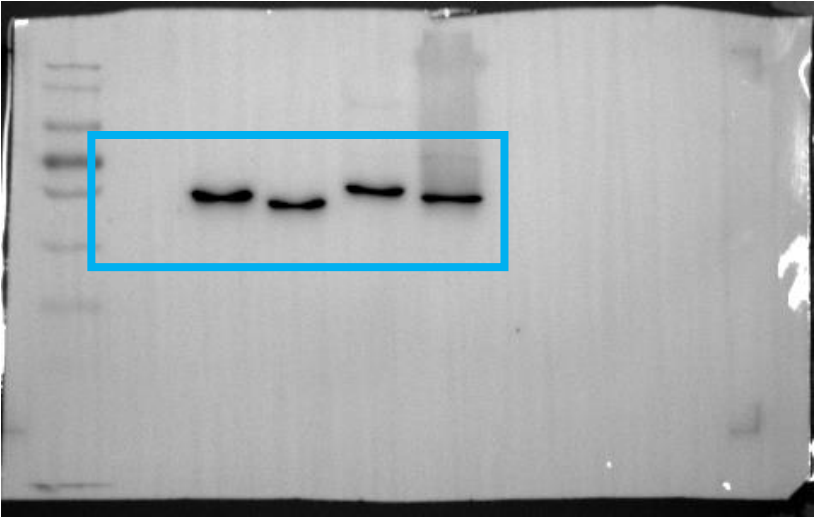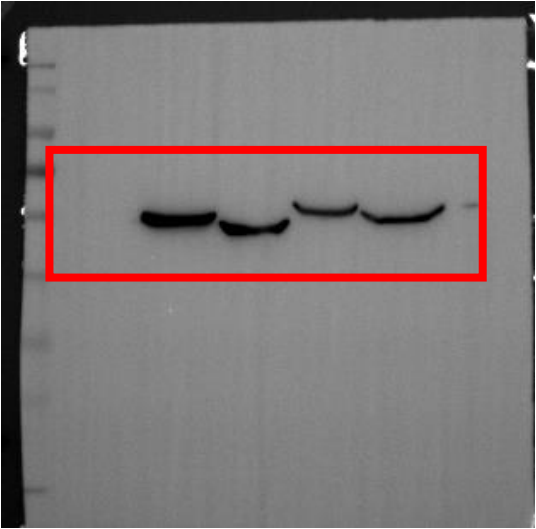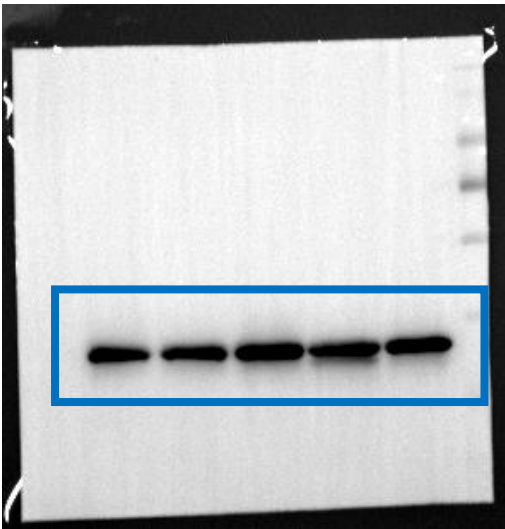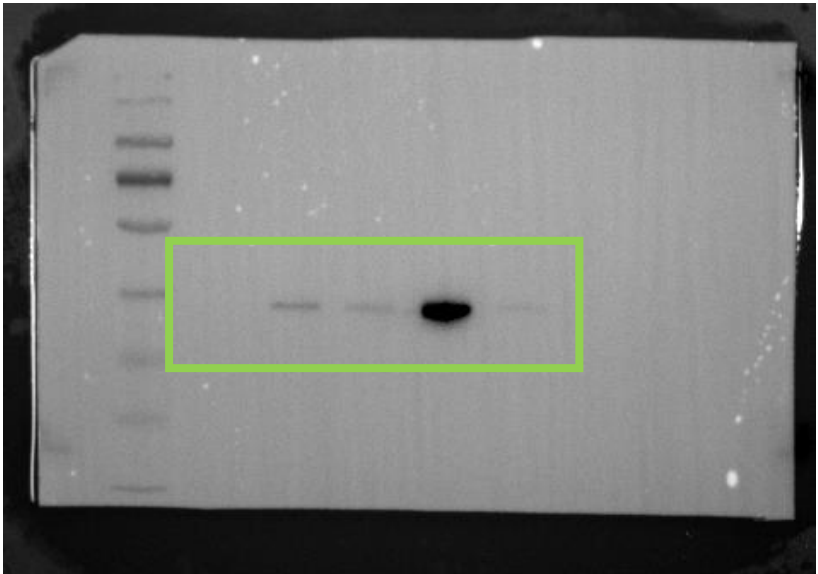

Figure 2-figure supplement 1-source data 1

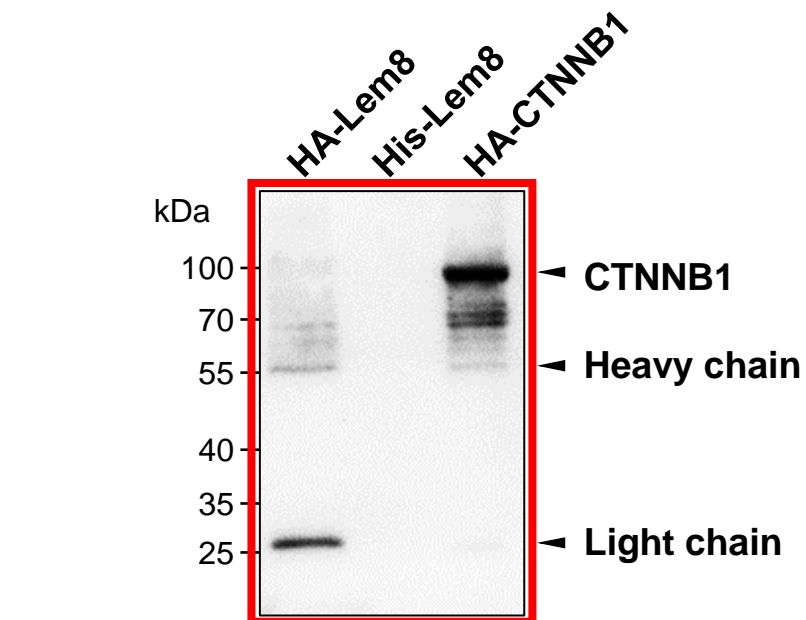

IB: pan phospho-serine/threonine antibody

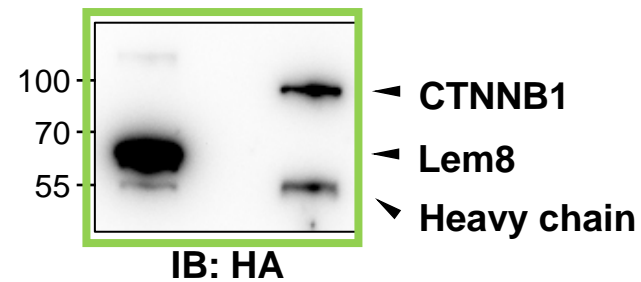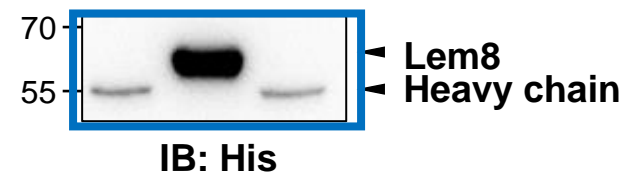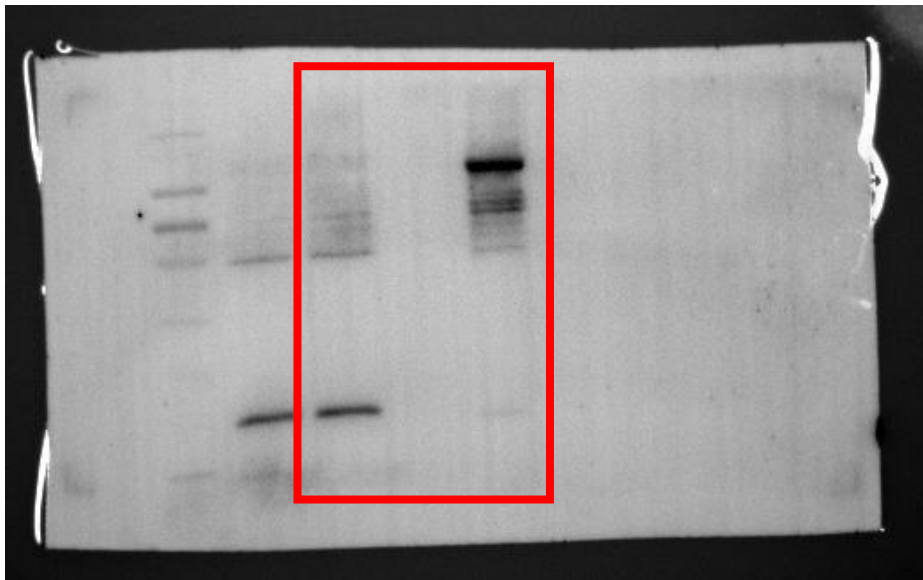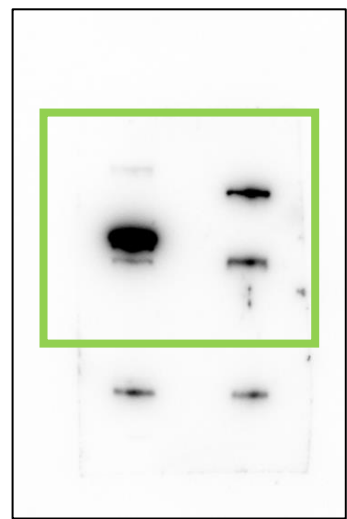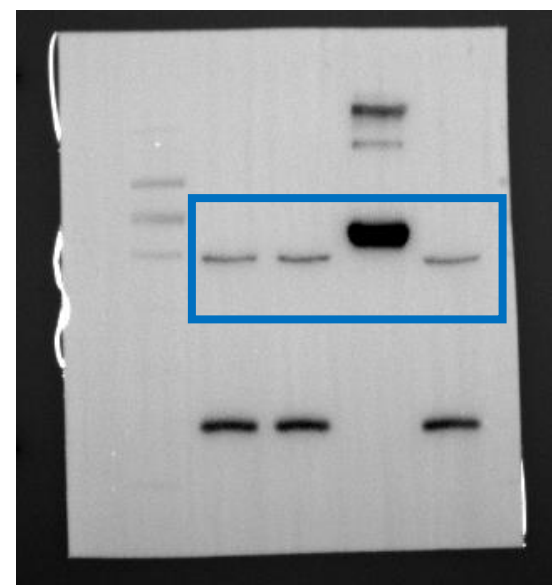



Figure 3-source data 1

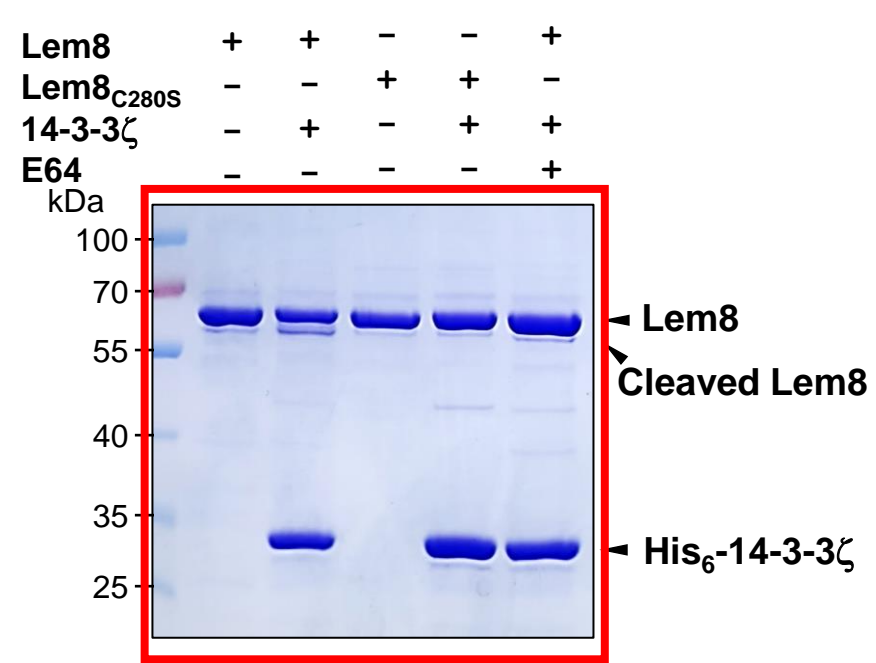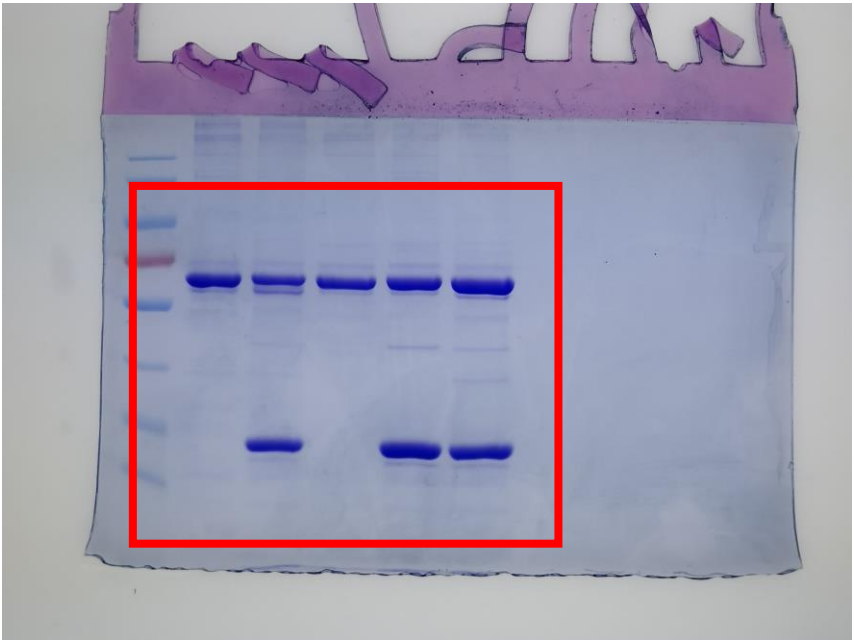

Figure 3-source data 2

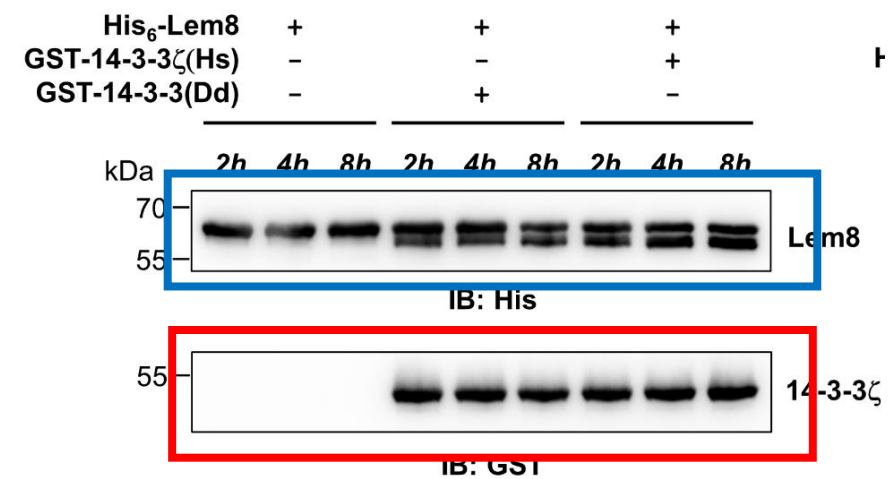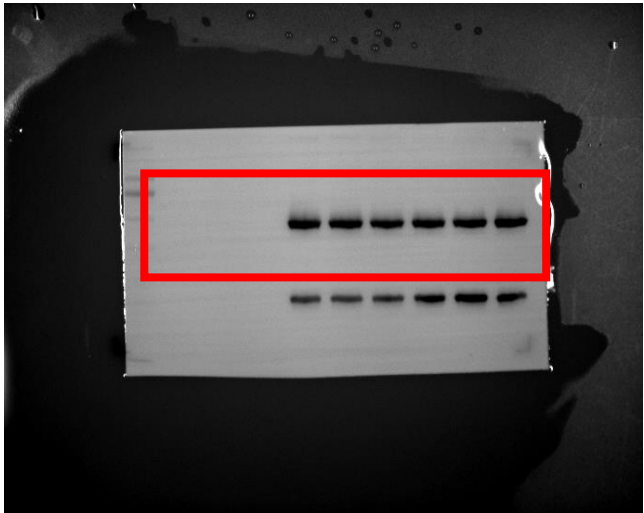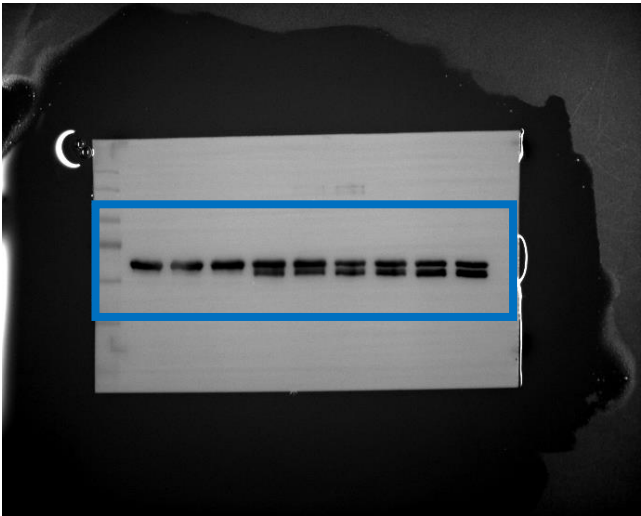



Figure 3-source data 3

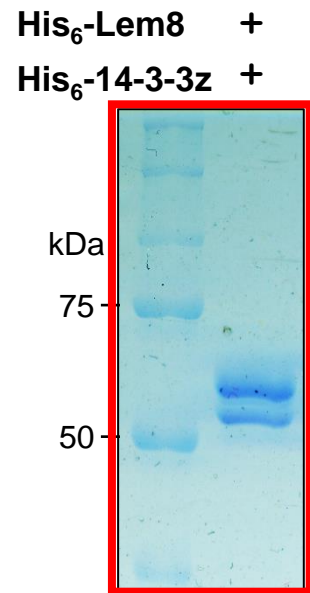

Figure 3-source data 4

|                             |   |   |
|-----------------------------|---|---|
| His <sub>6</sub> -Lem8      | + | - |
| His <sub>6</sub> -Lem8 (4A) | - | + |
| His <sub>6</sub> -14-3-3ζ   | + | + |

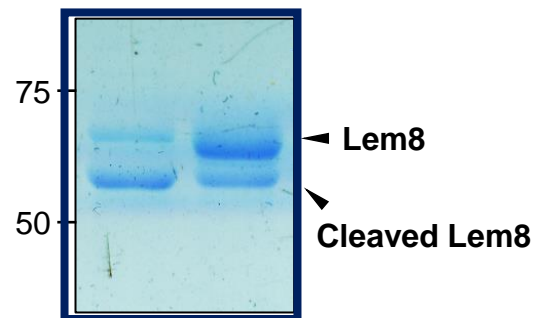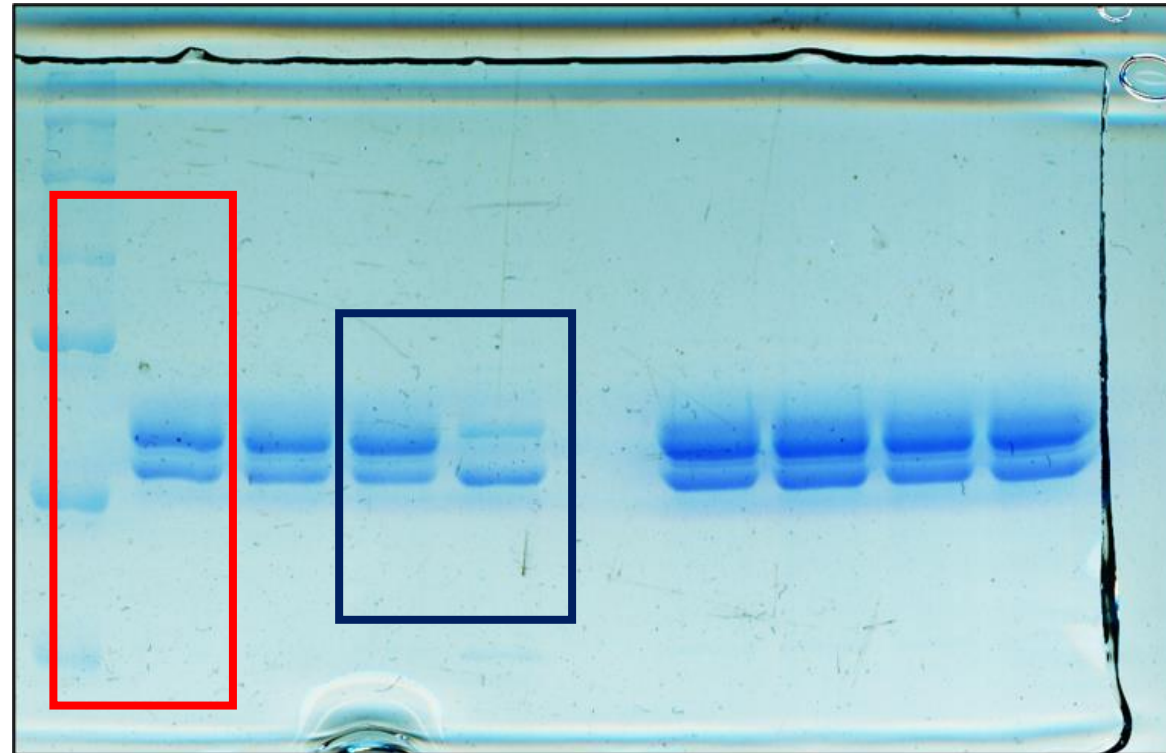

Figure 3-figure supplement 1-source data 1

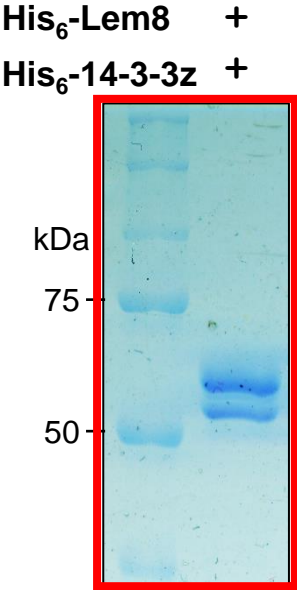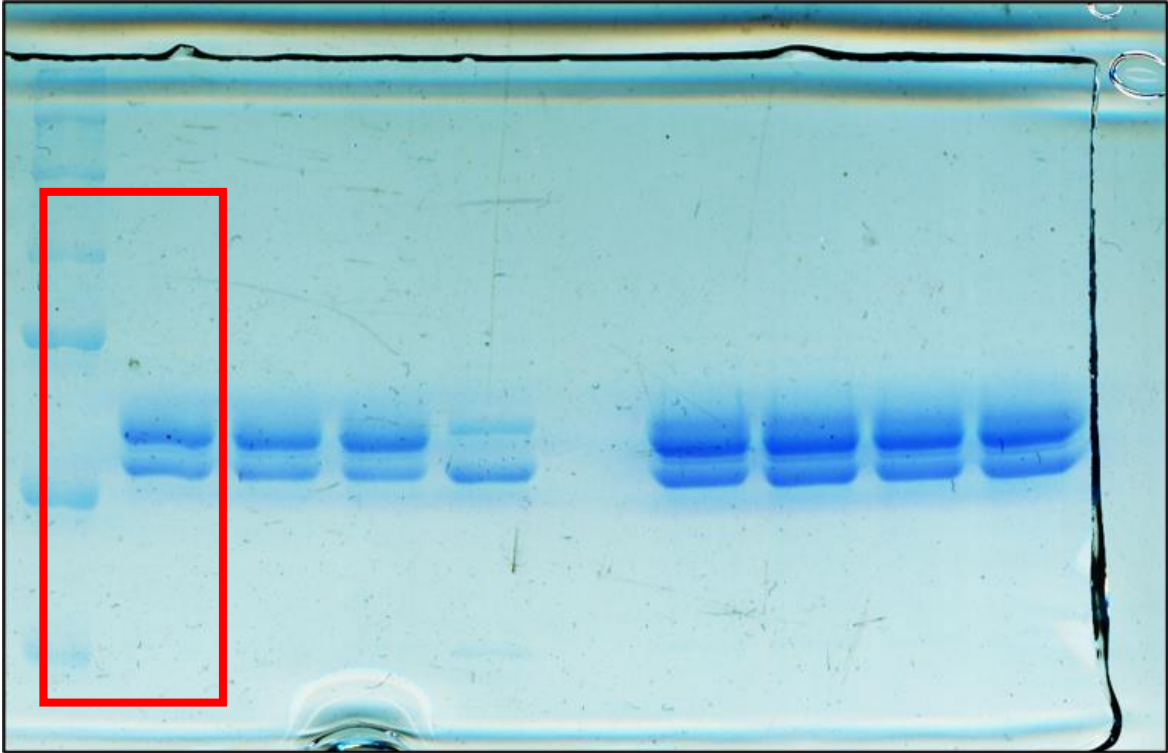

Figure 3-figure supplement 1-source data 2

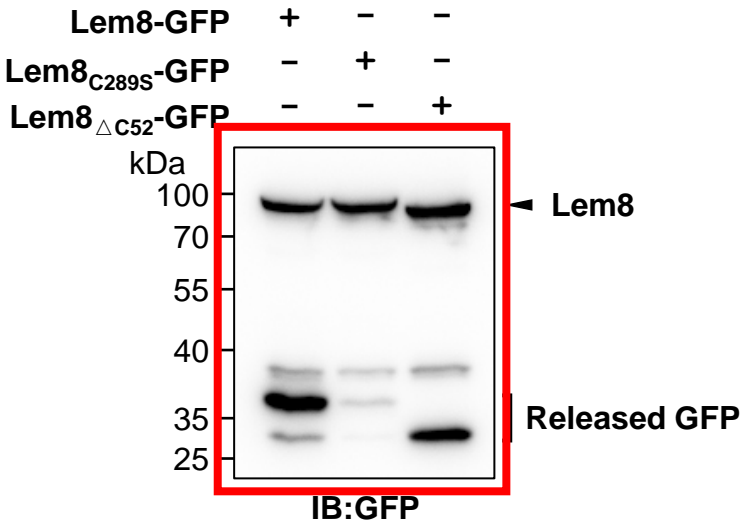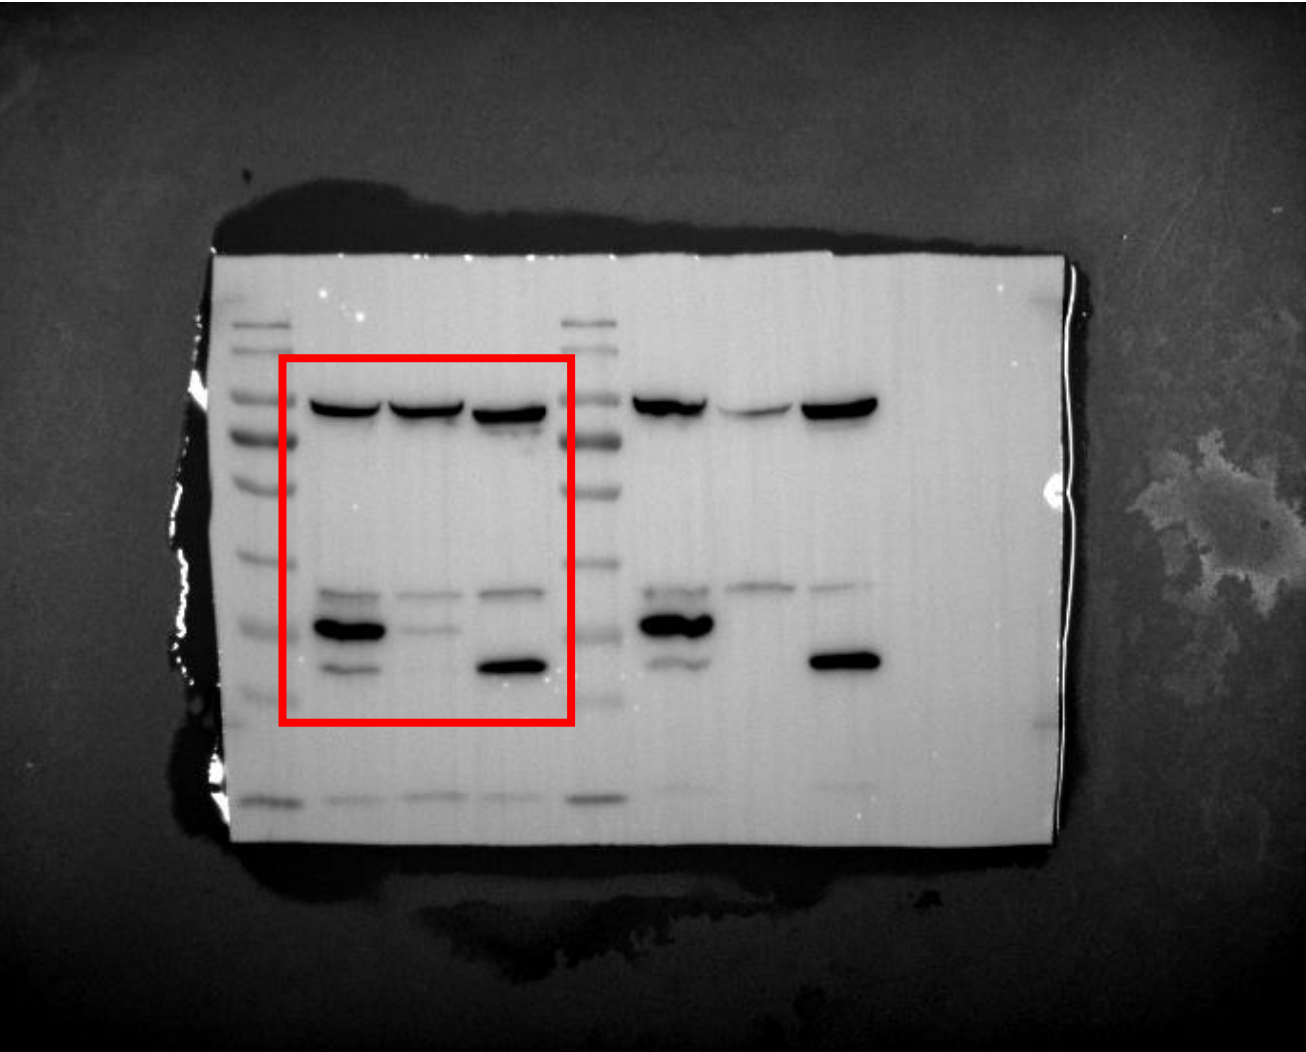

Figure 3-figure supplement 1-source data 3

C

His<sub>6</sub>-Lem8 (4A)      +  
His<sub>6</sub>-14-3-3 $\zeta$       +

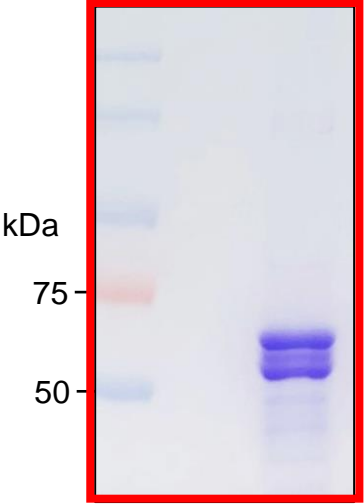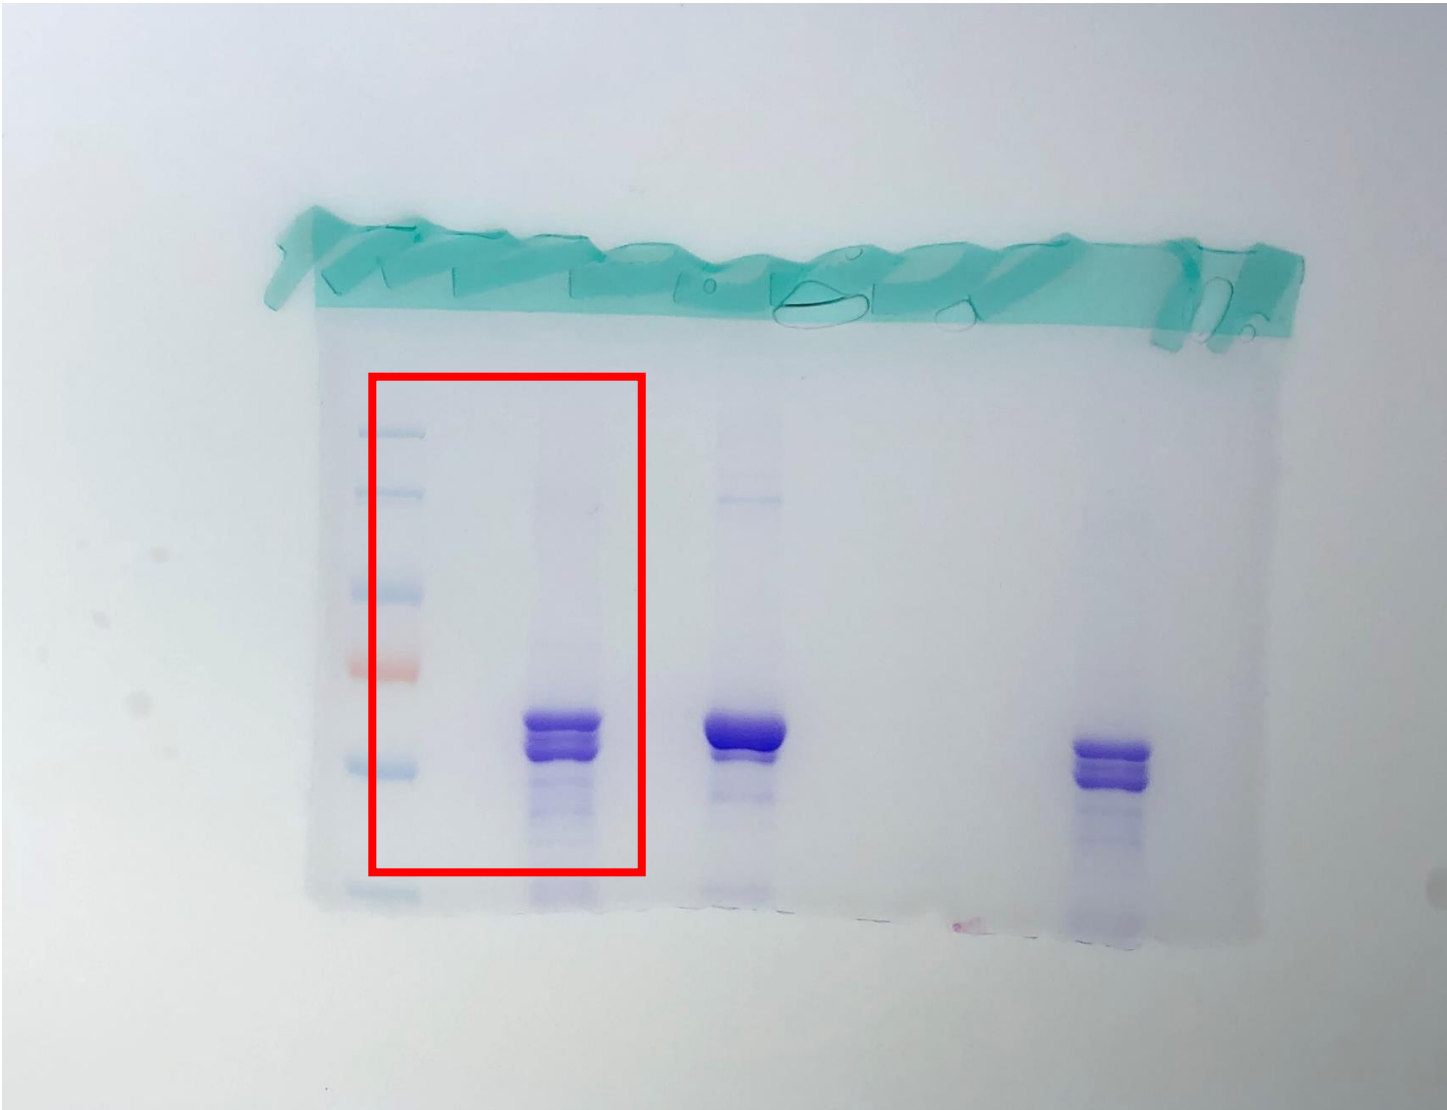

Figure 4-source data 1

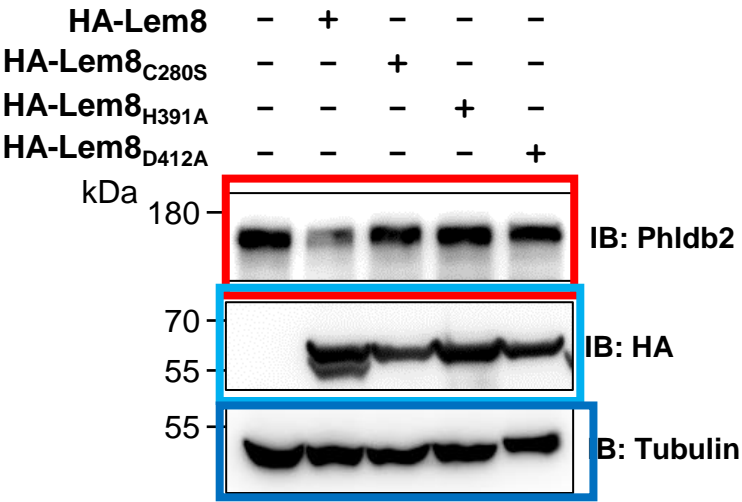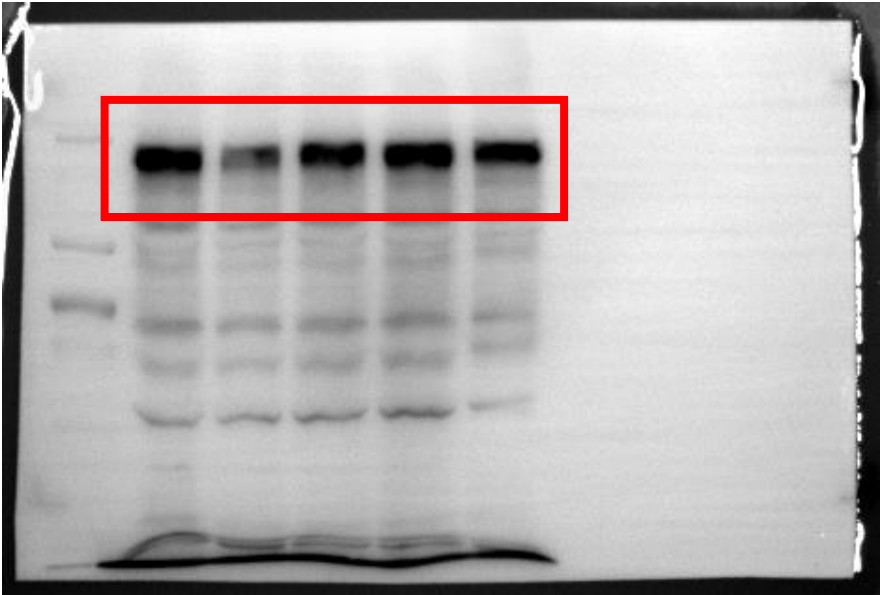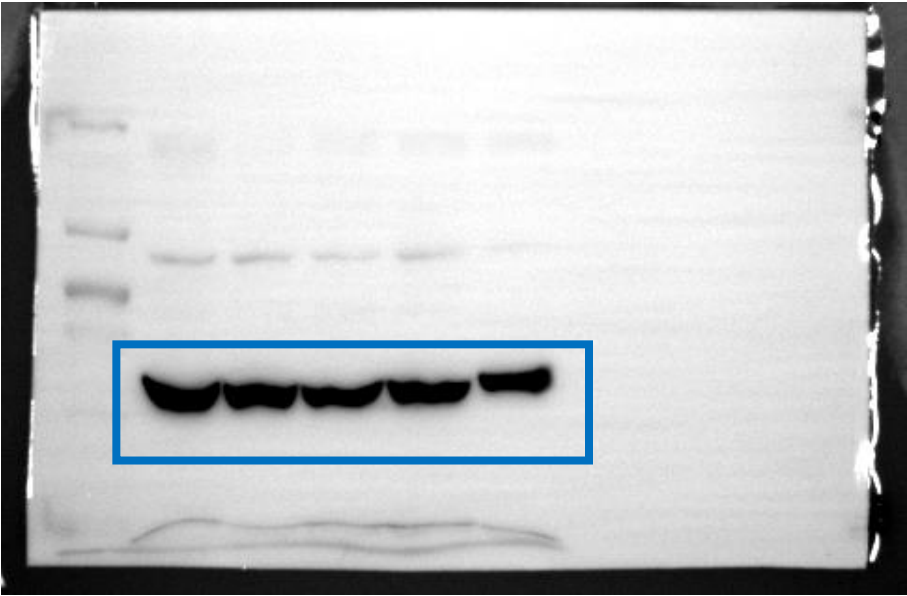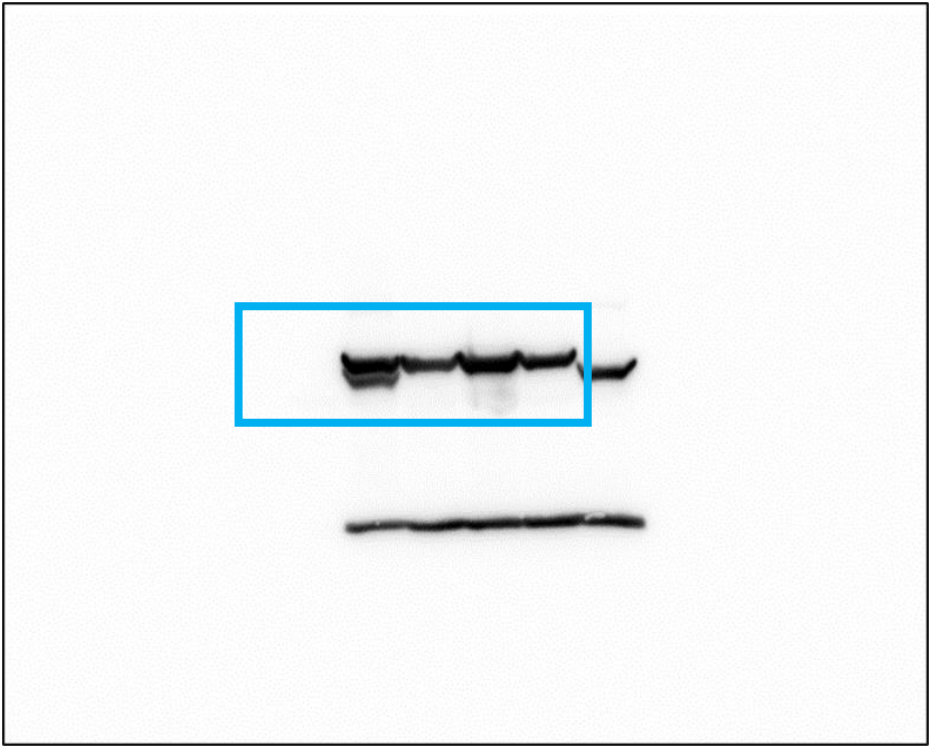



Figure 4-source data 2

C

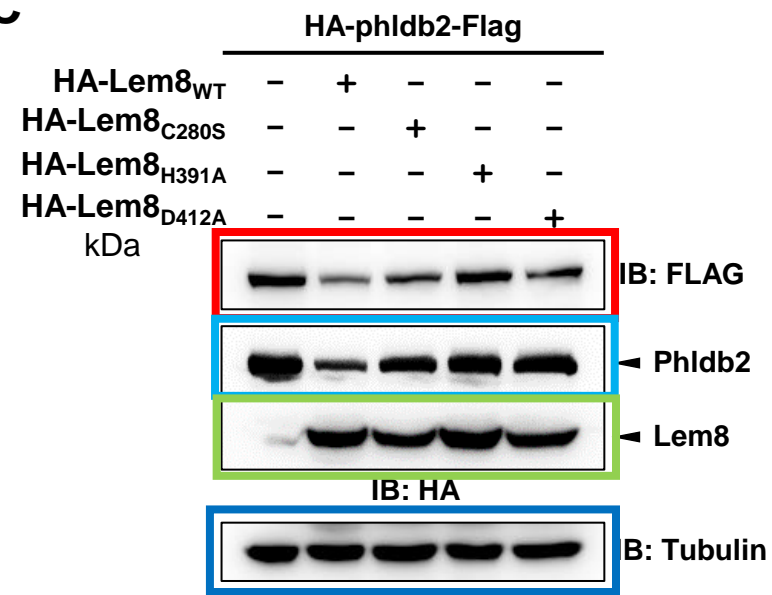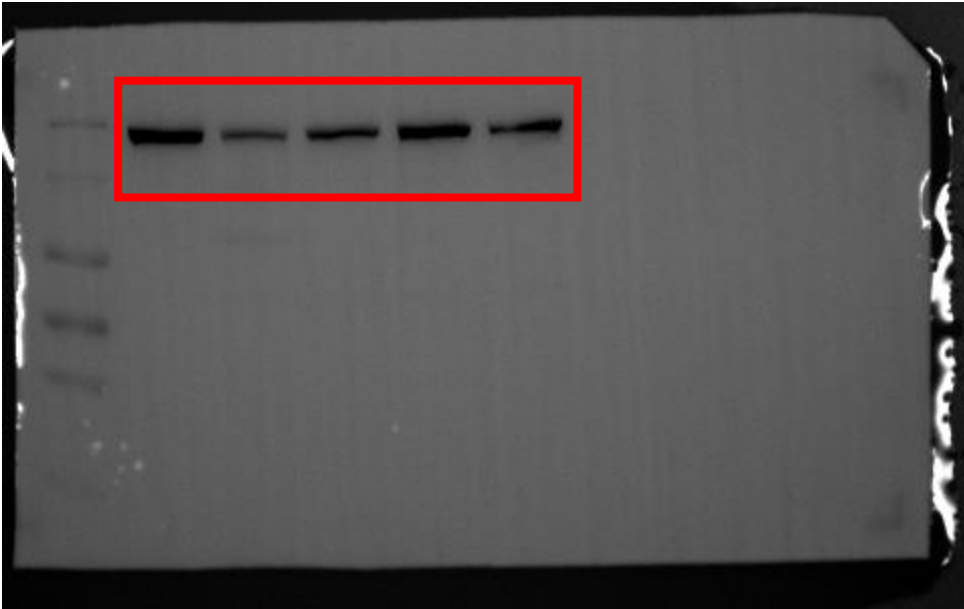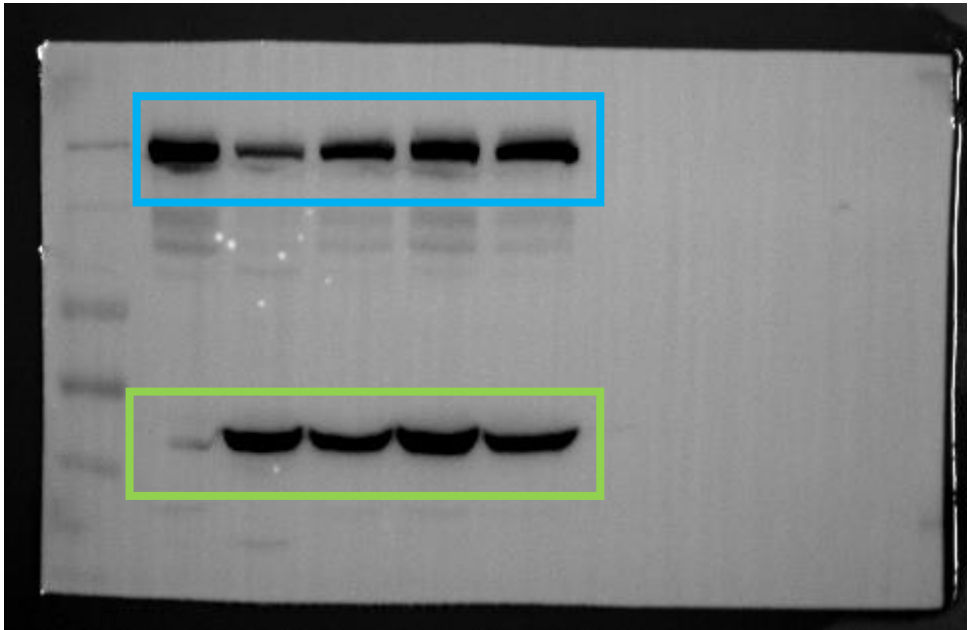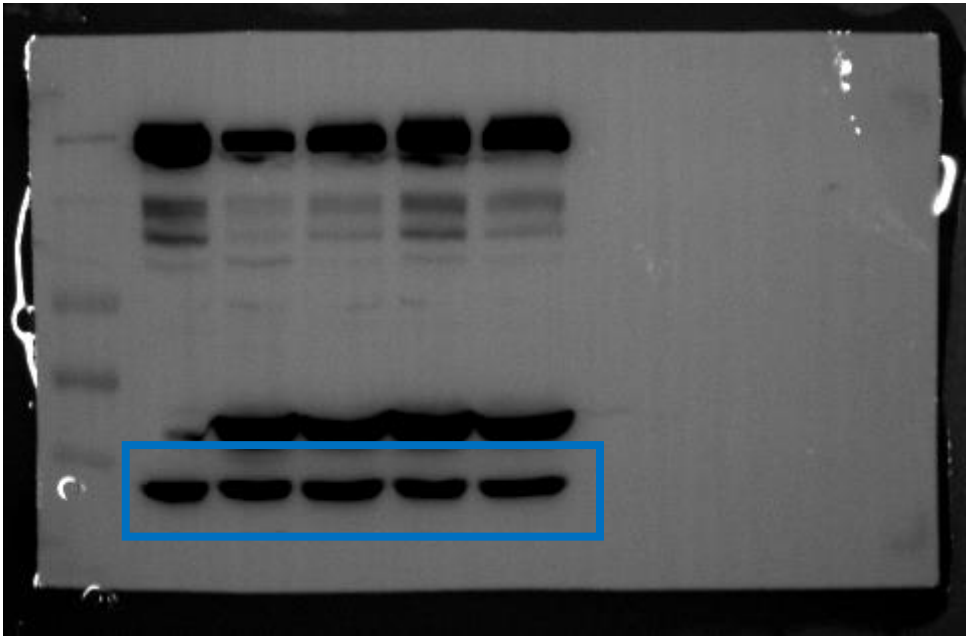



Figure 4-source data 4

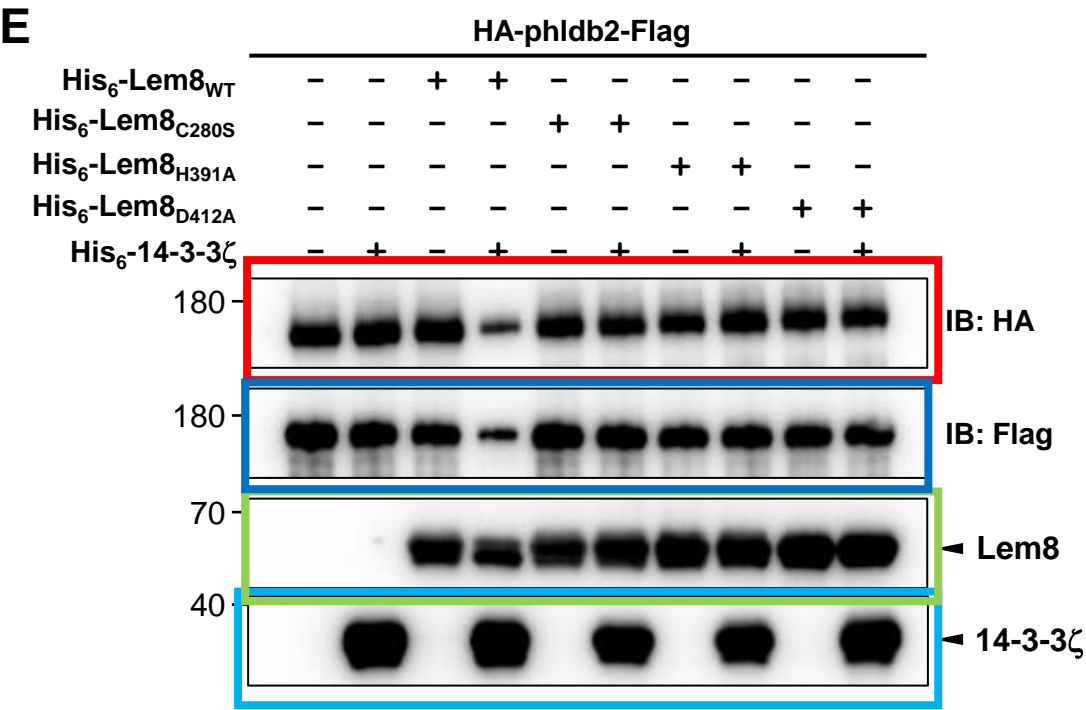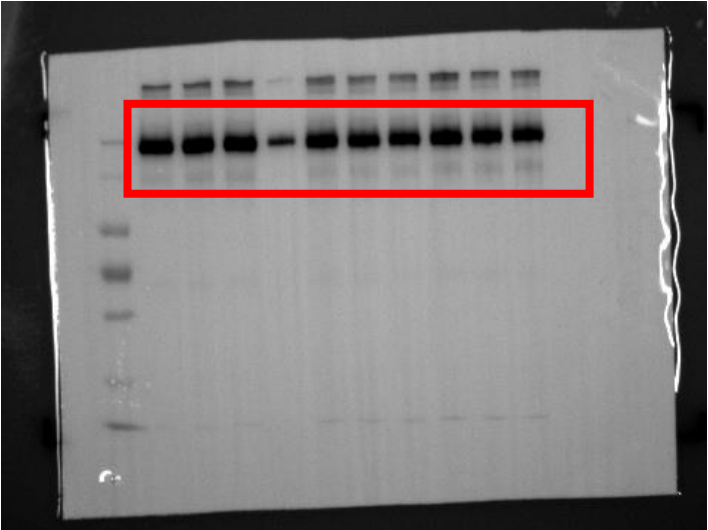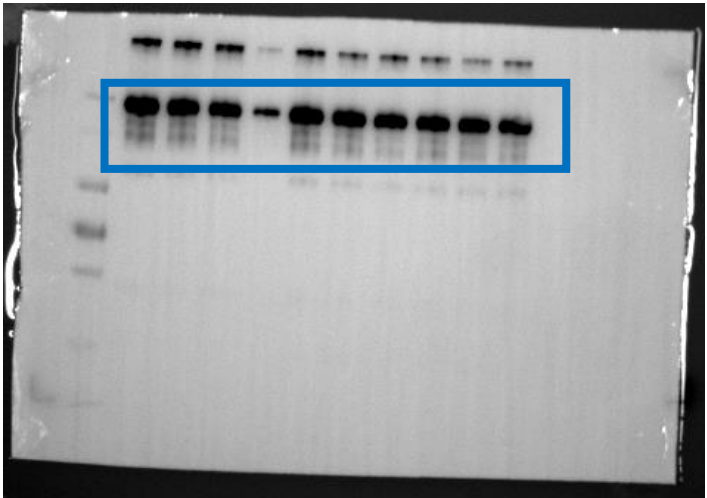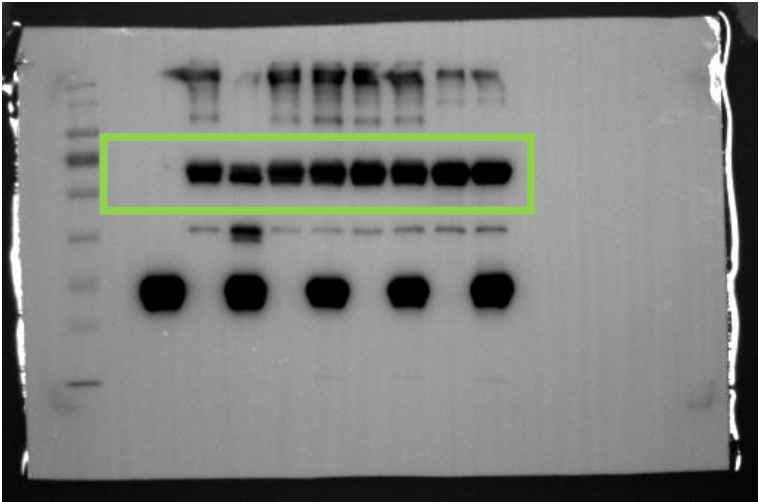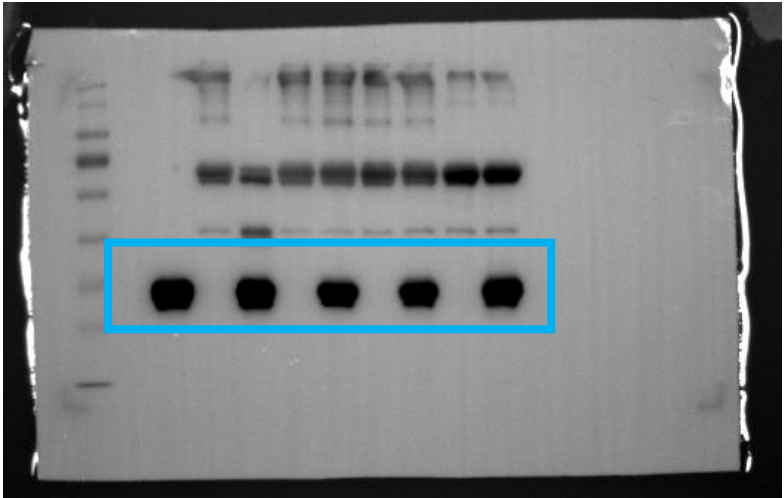

Figure 4-figure supplement 1-source data 1

A

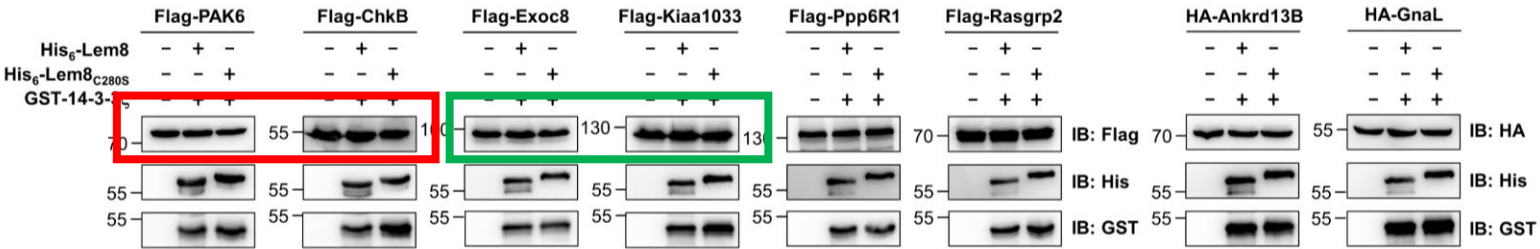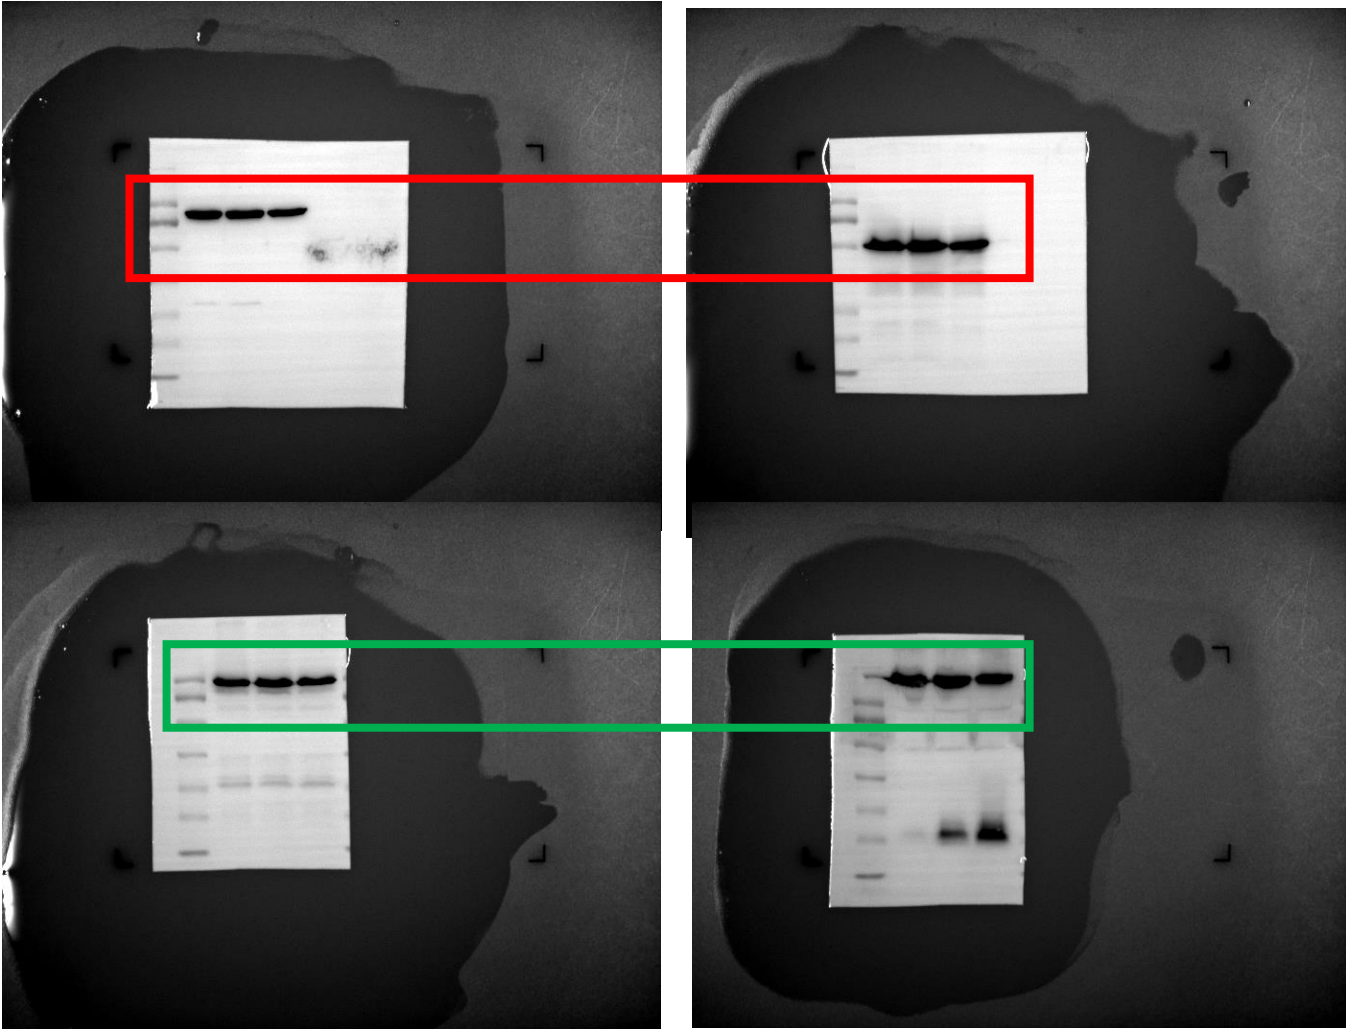

Figure 4-figure supplement 1-source data 1

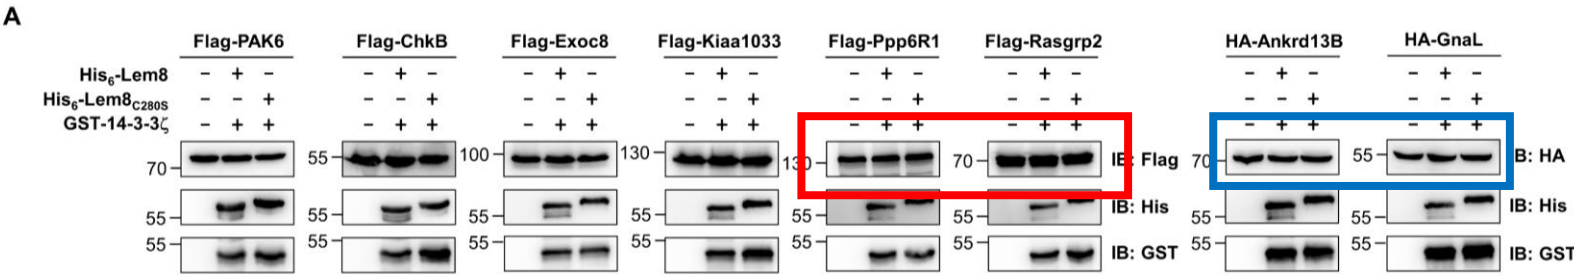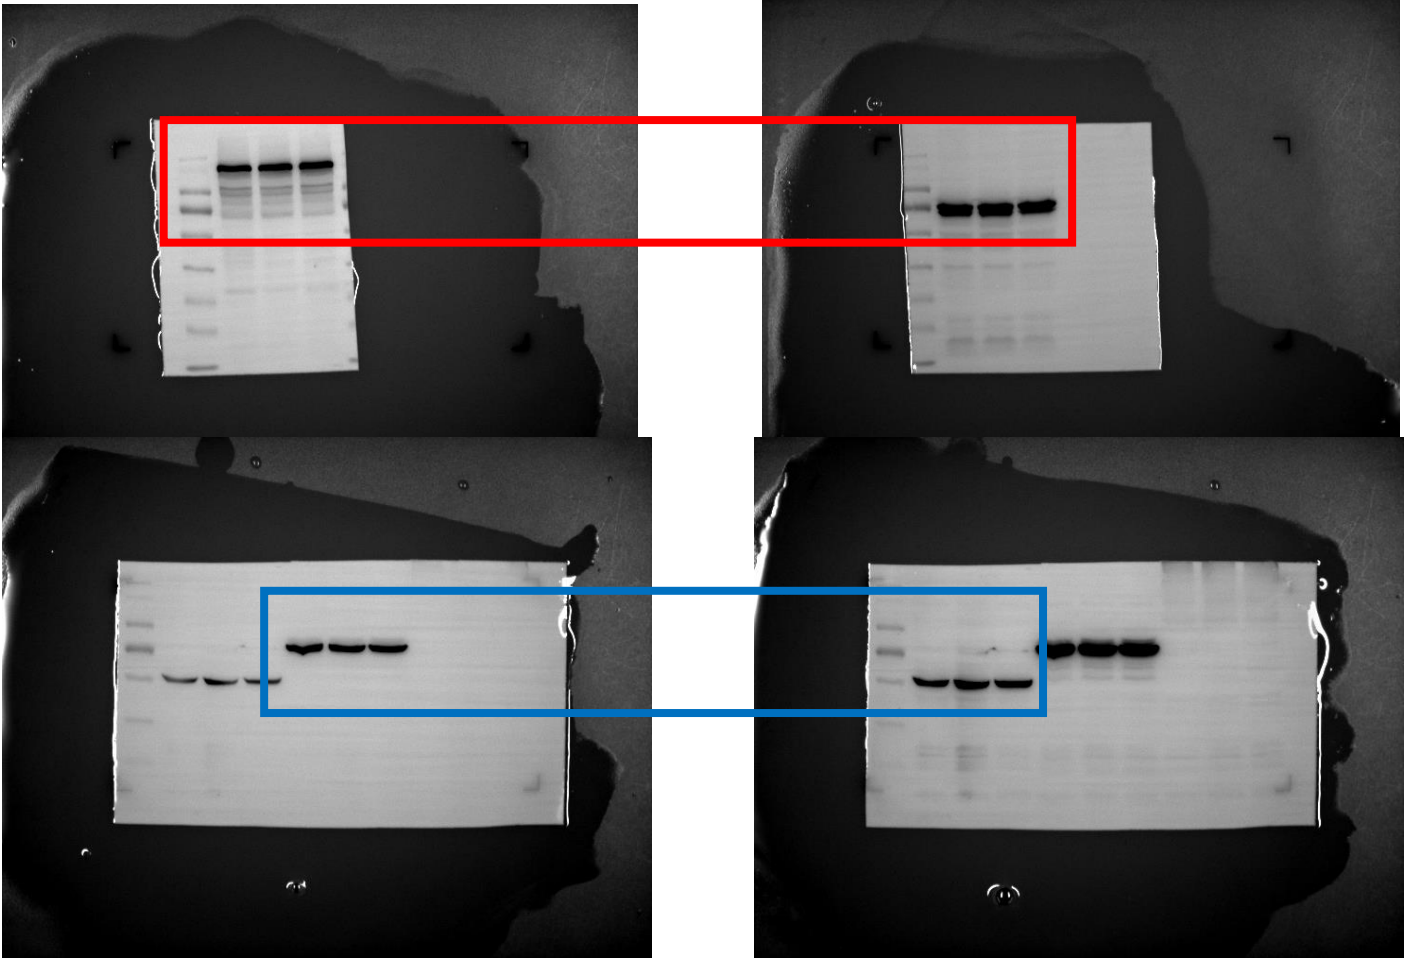





Figure 4-figure supplement 1-source data 3

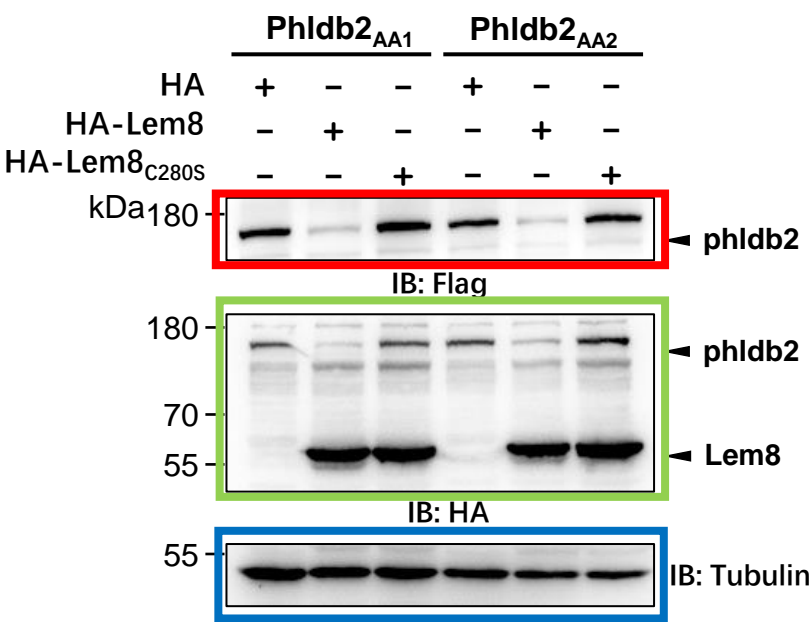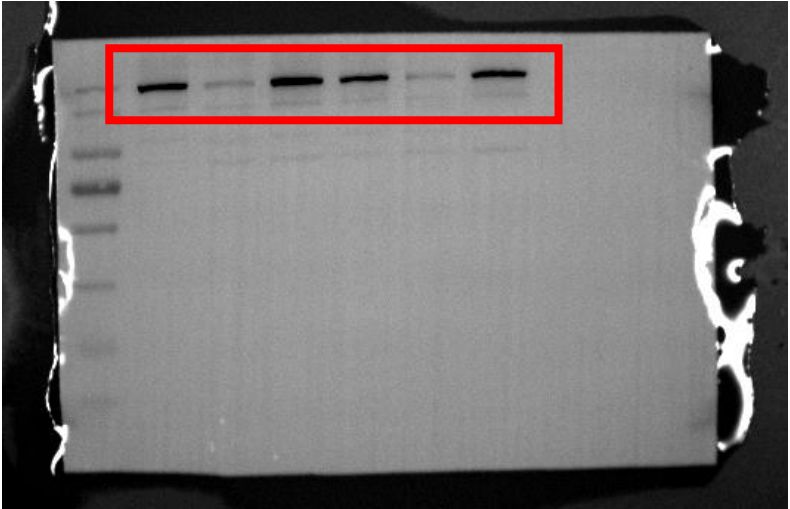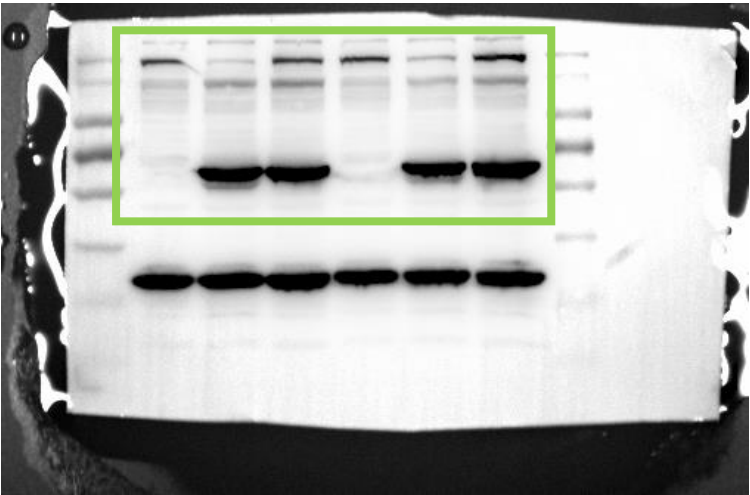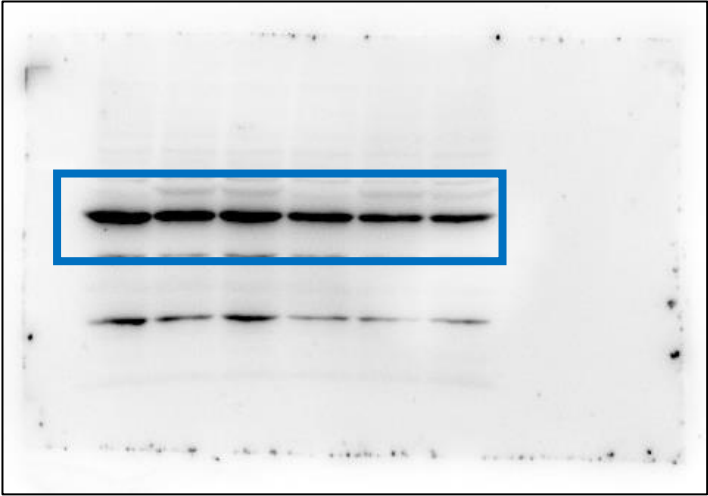

Figure 4-figure supplement 1-source data 4

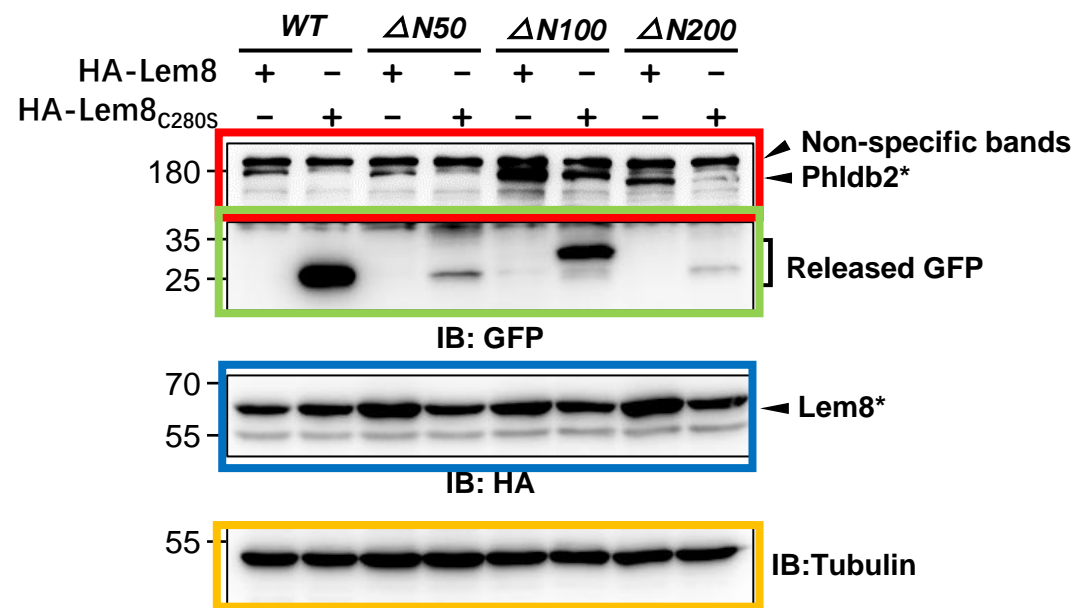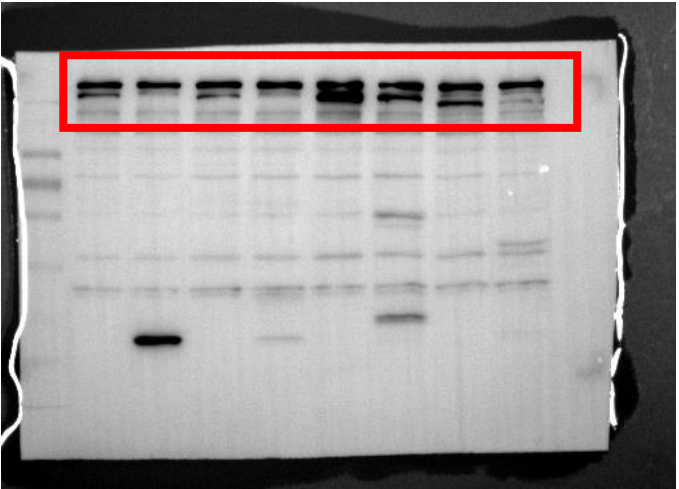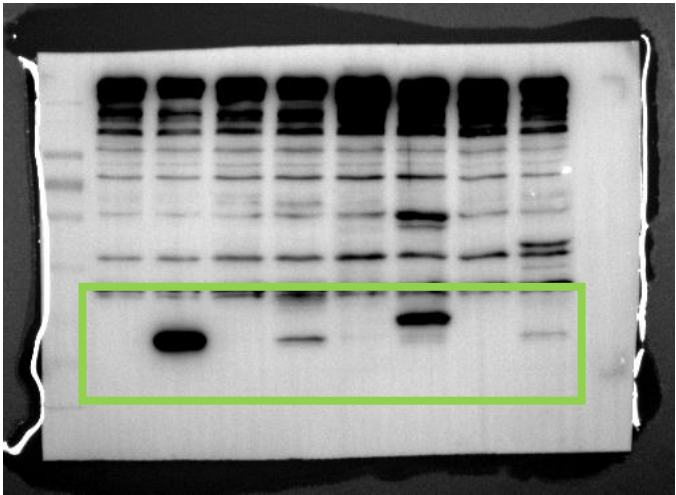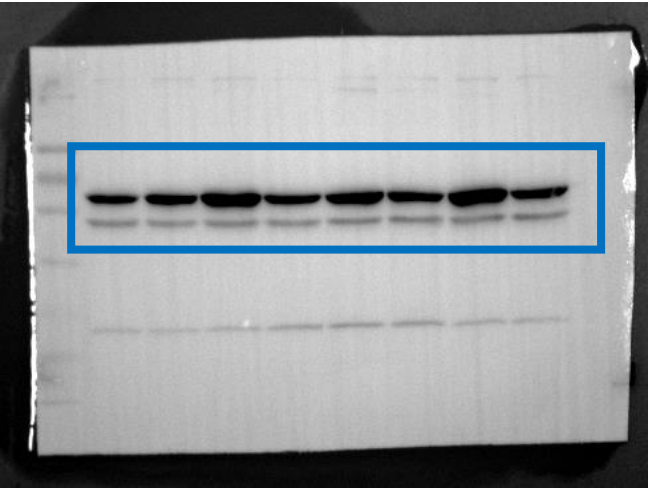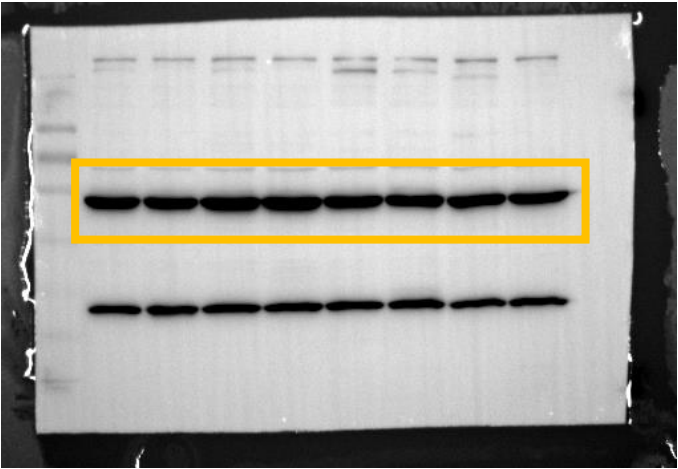



Figure 4-figure supplement 1-source data 4

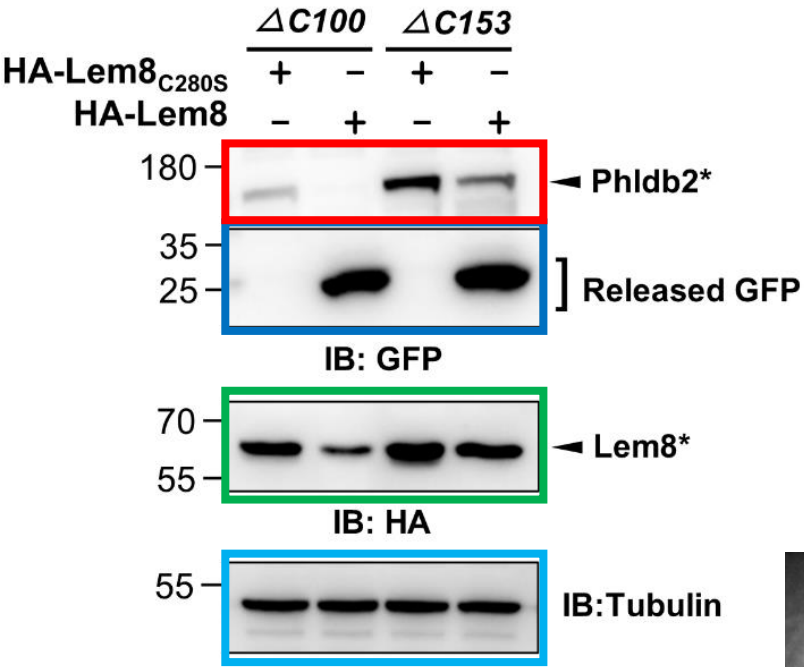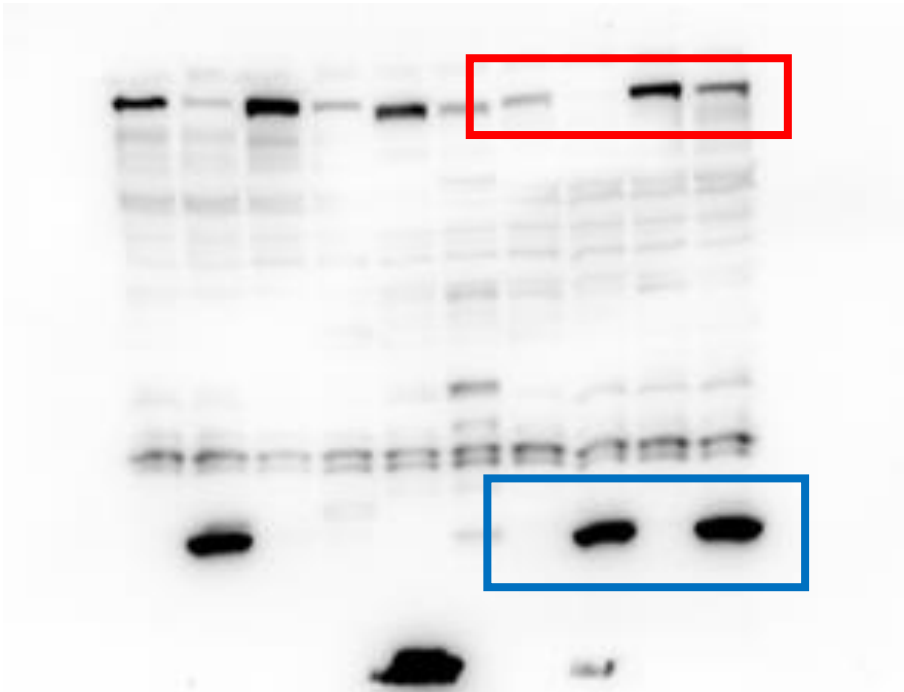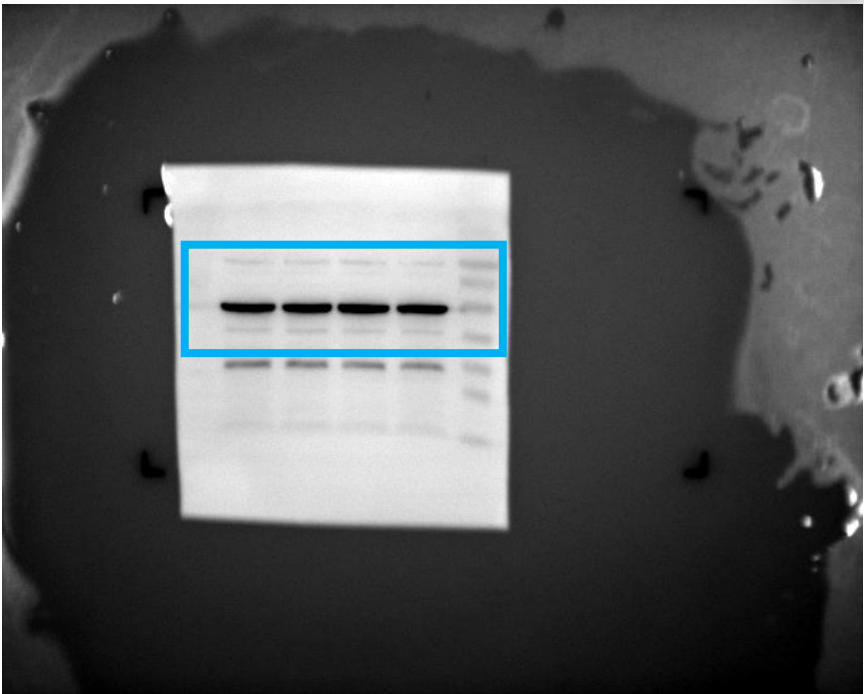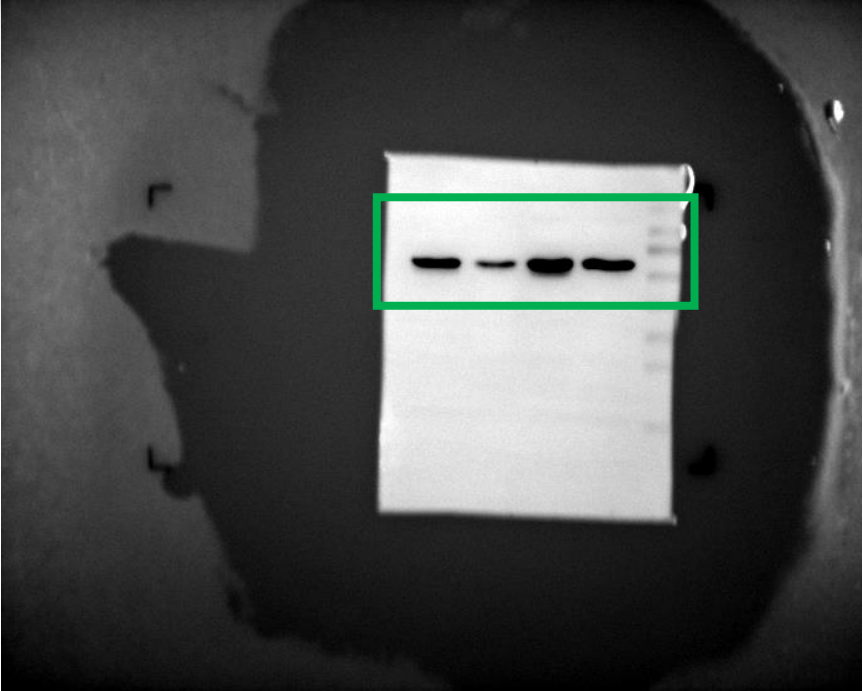

Figure 4-figure supplement 1-source data 5

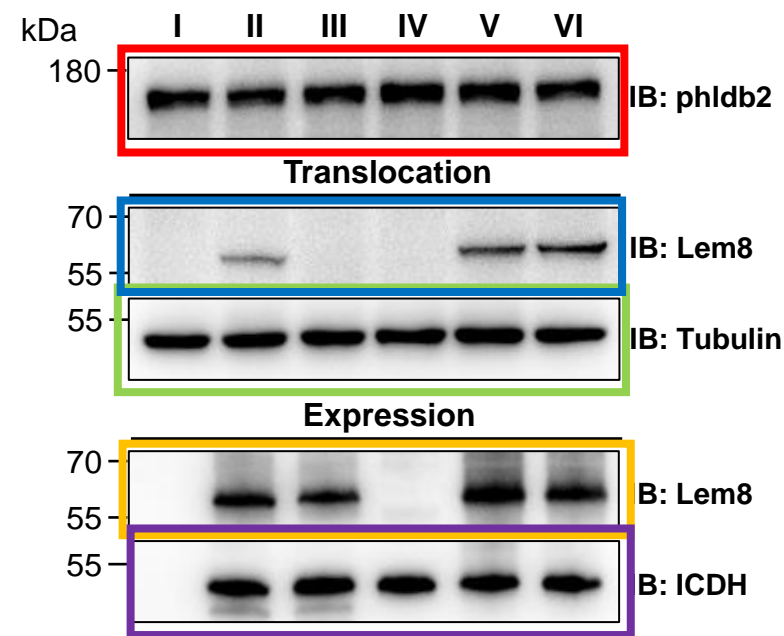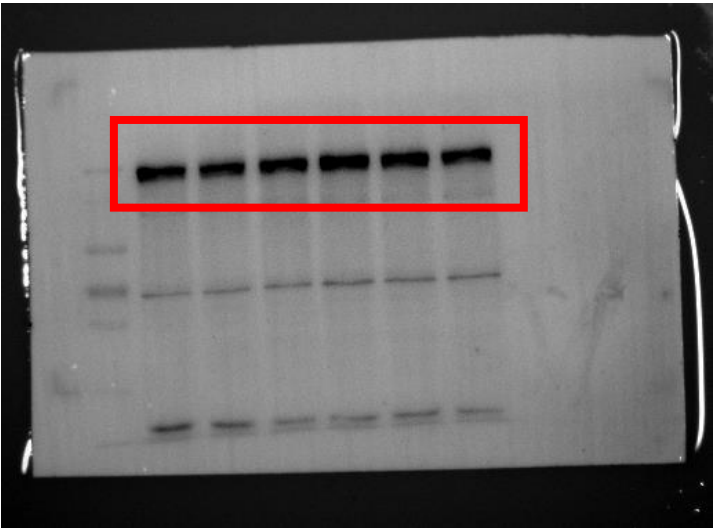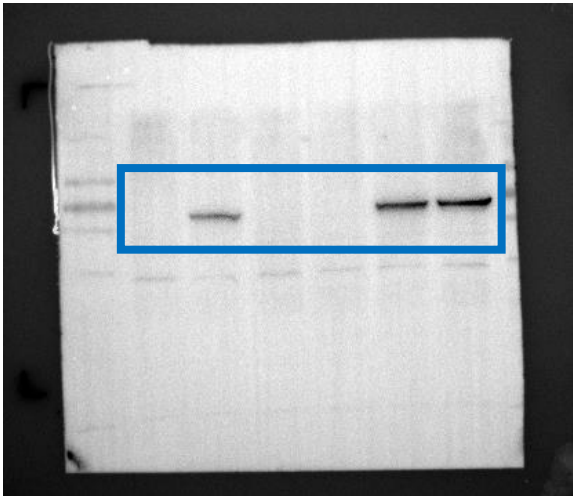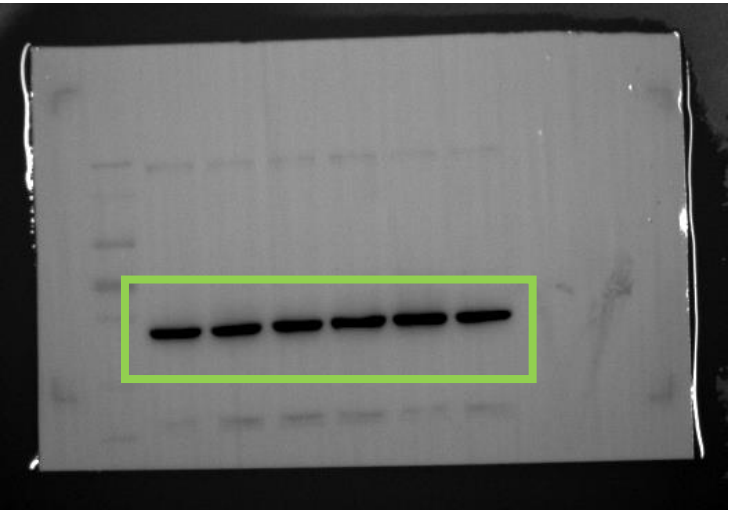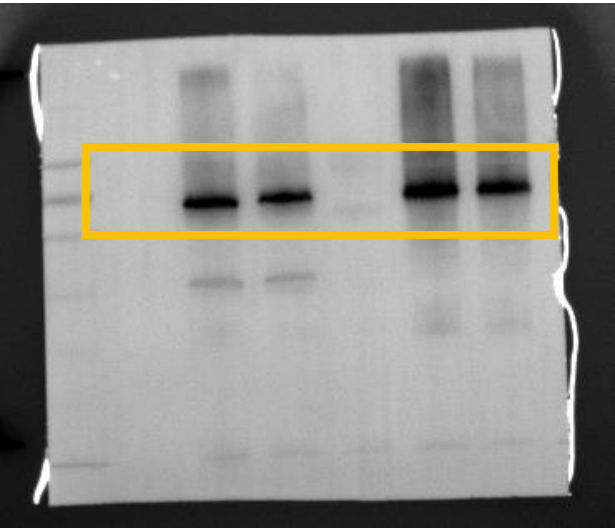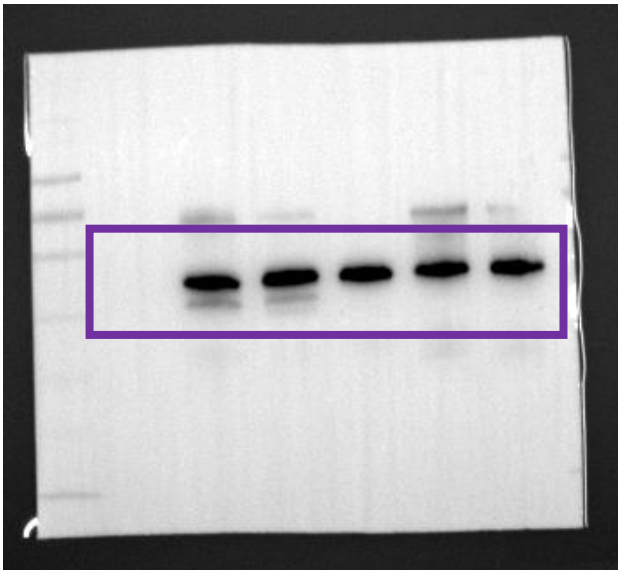

Figure 5-source data 1

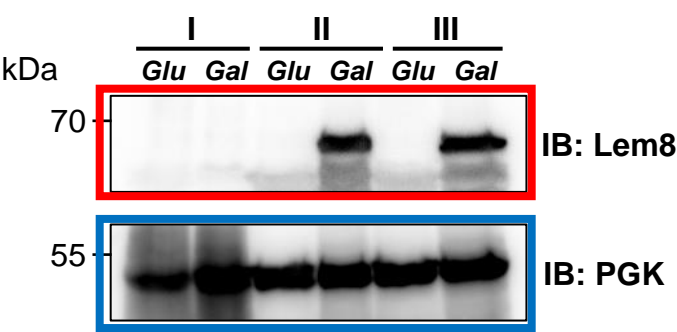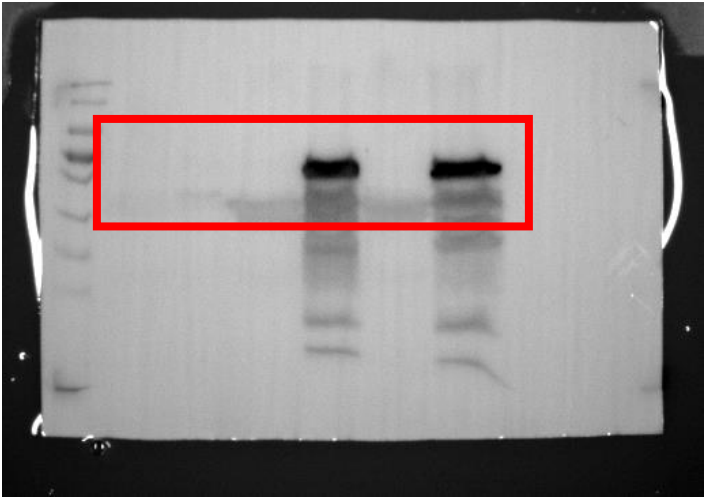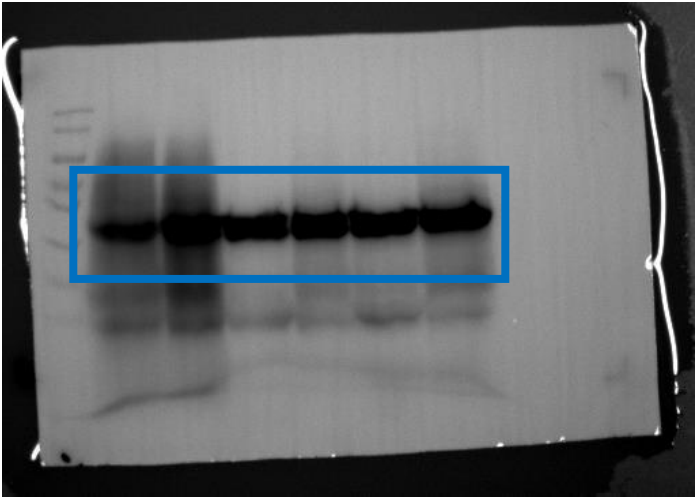

Figure 5-source data 2

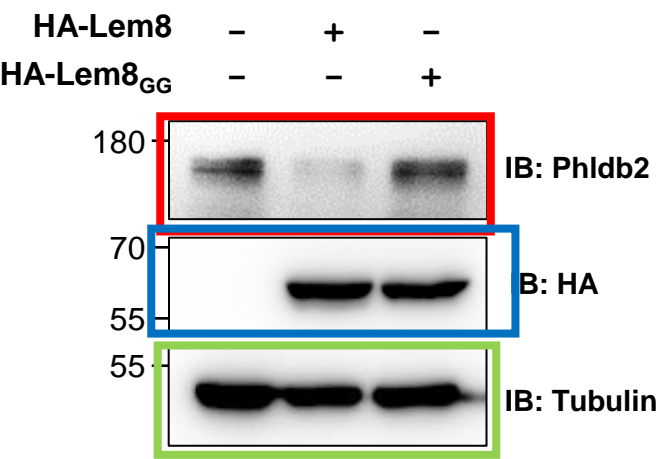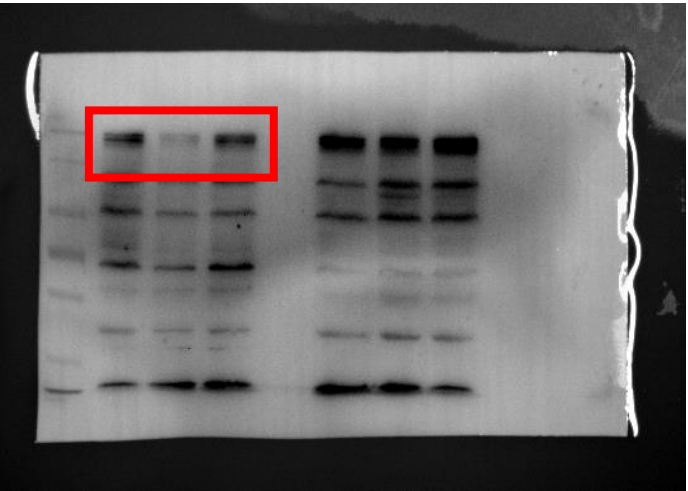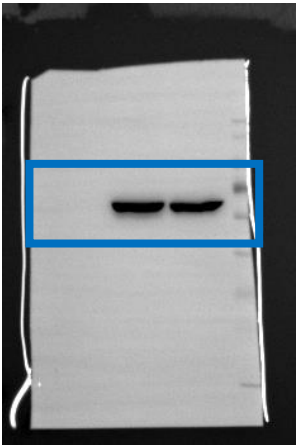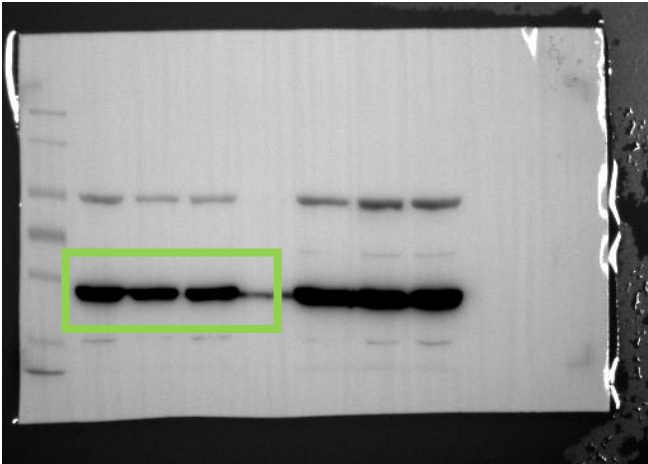

Figure 5-source data 3

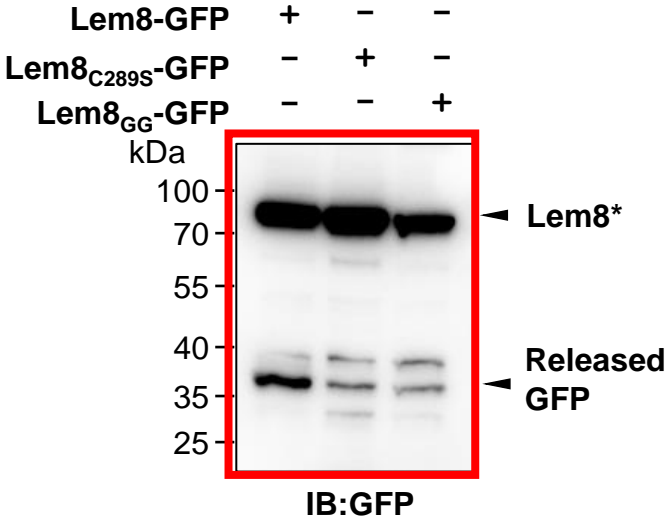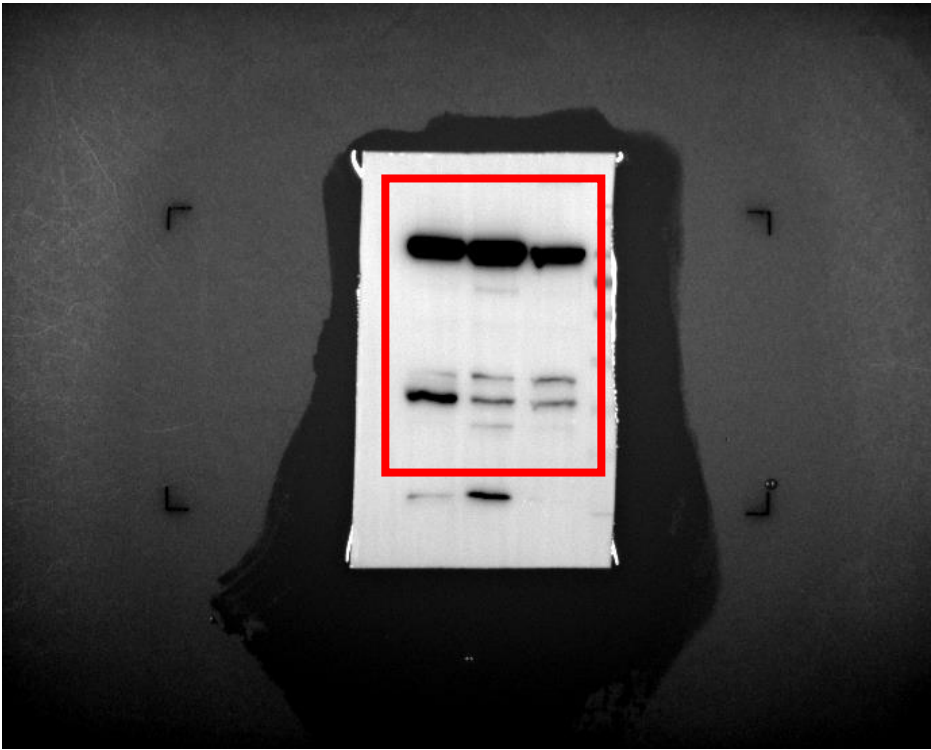

Figure 5-source data 4

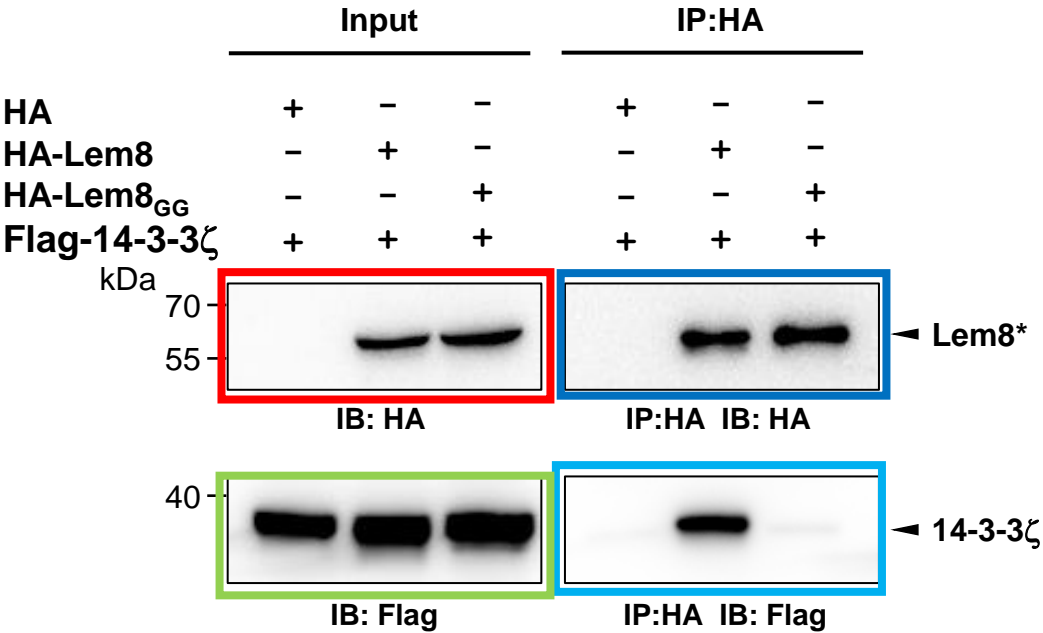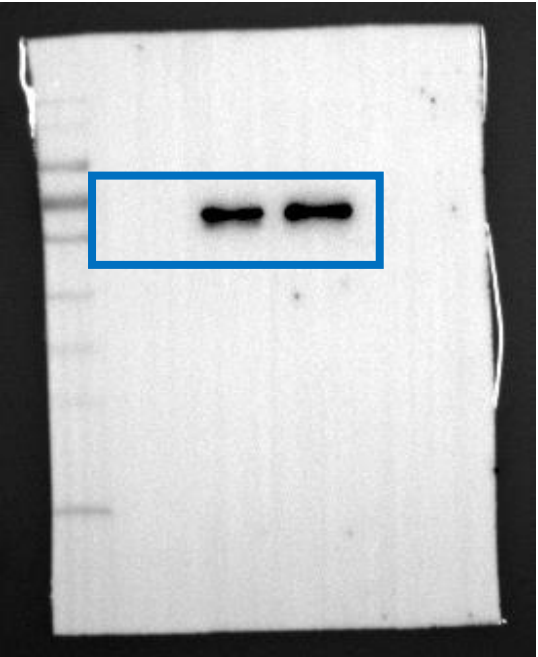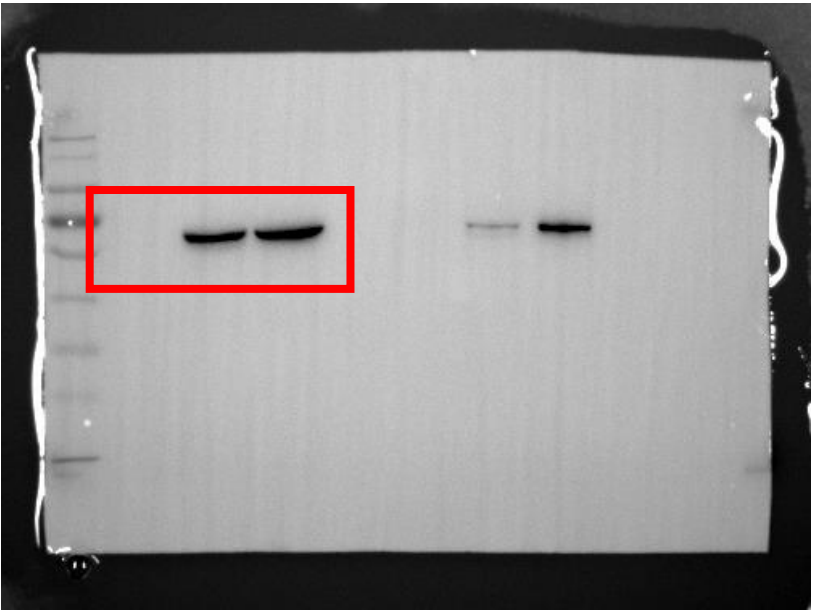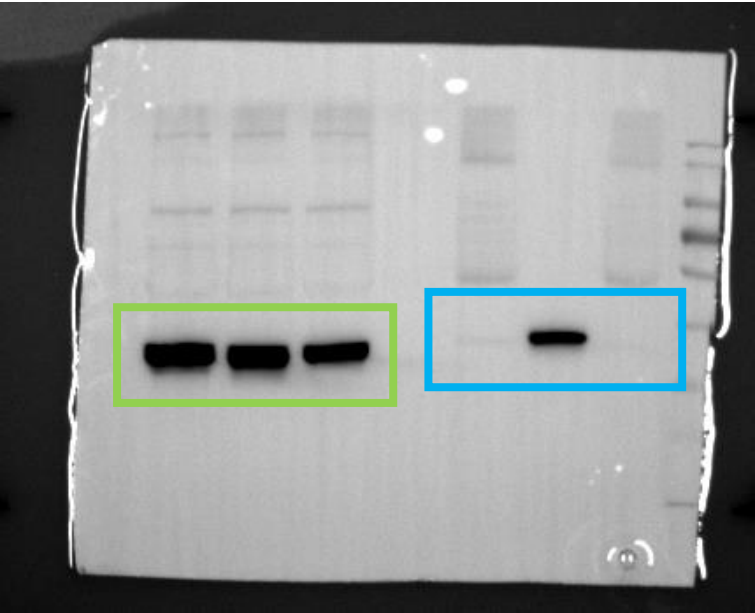



Figure 6-source data 1

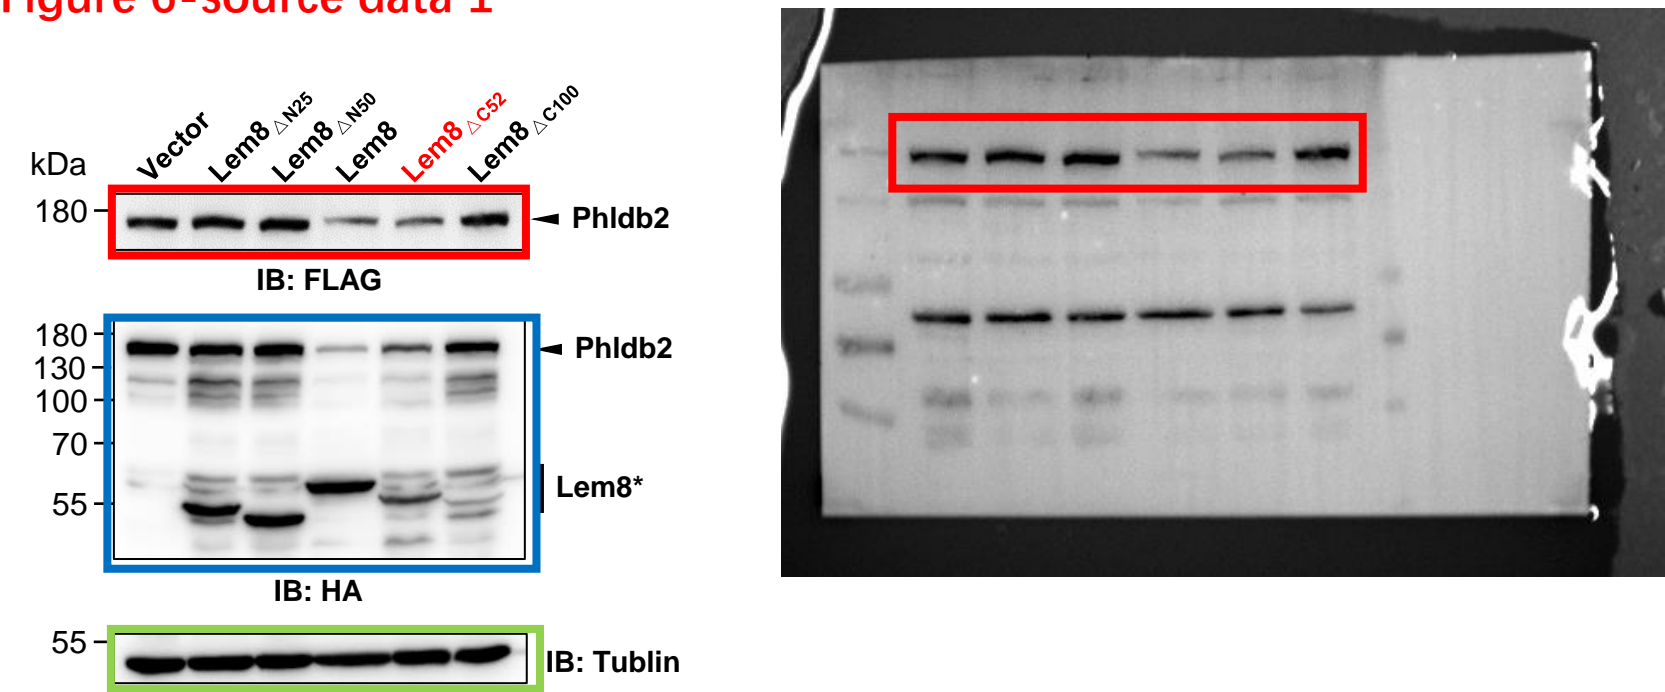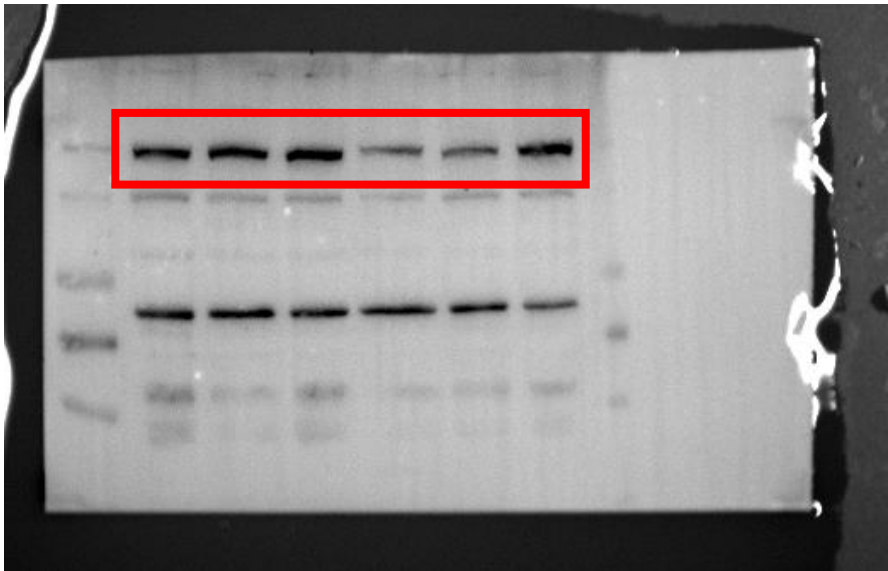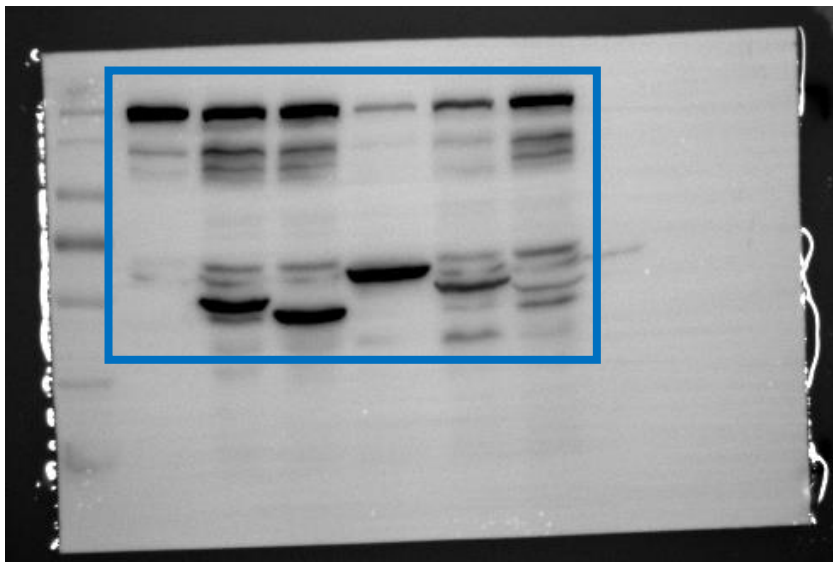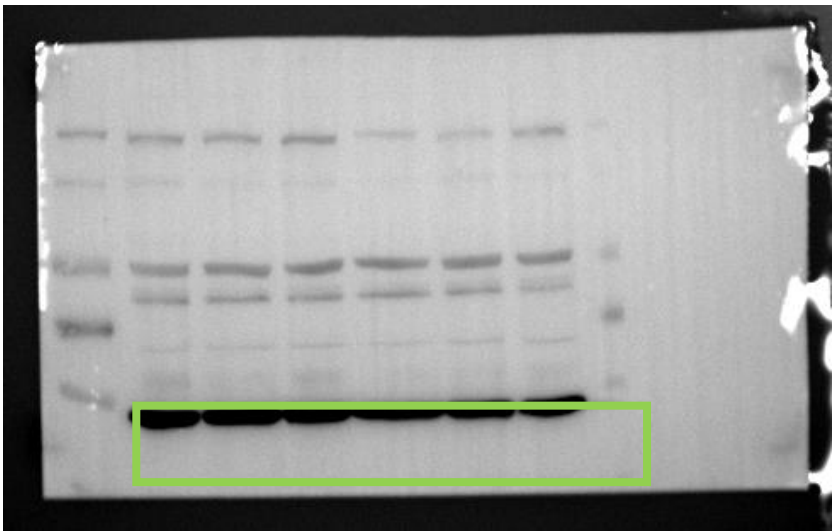



Figure 6-source data 3

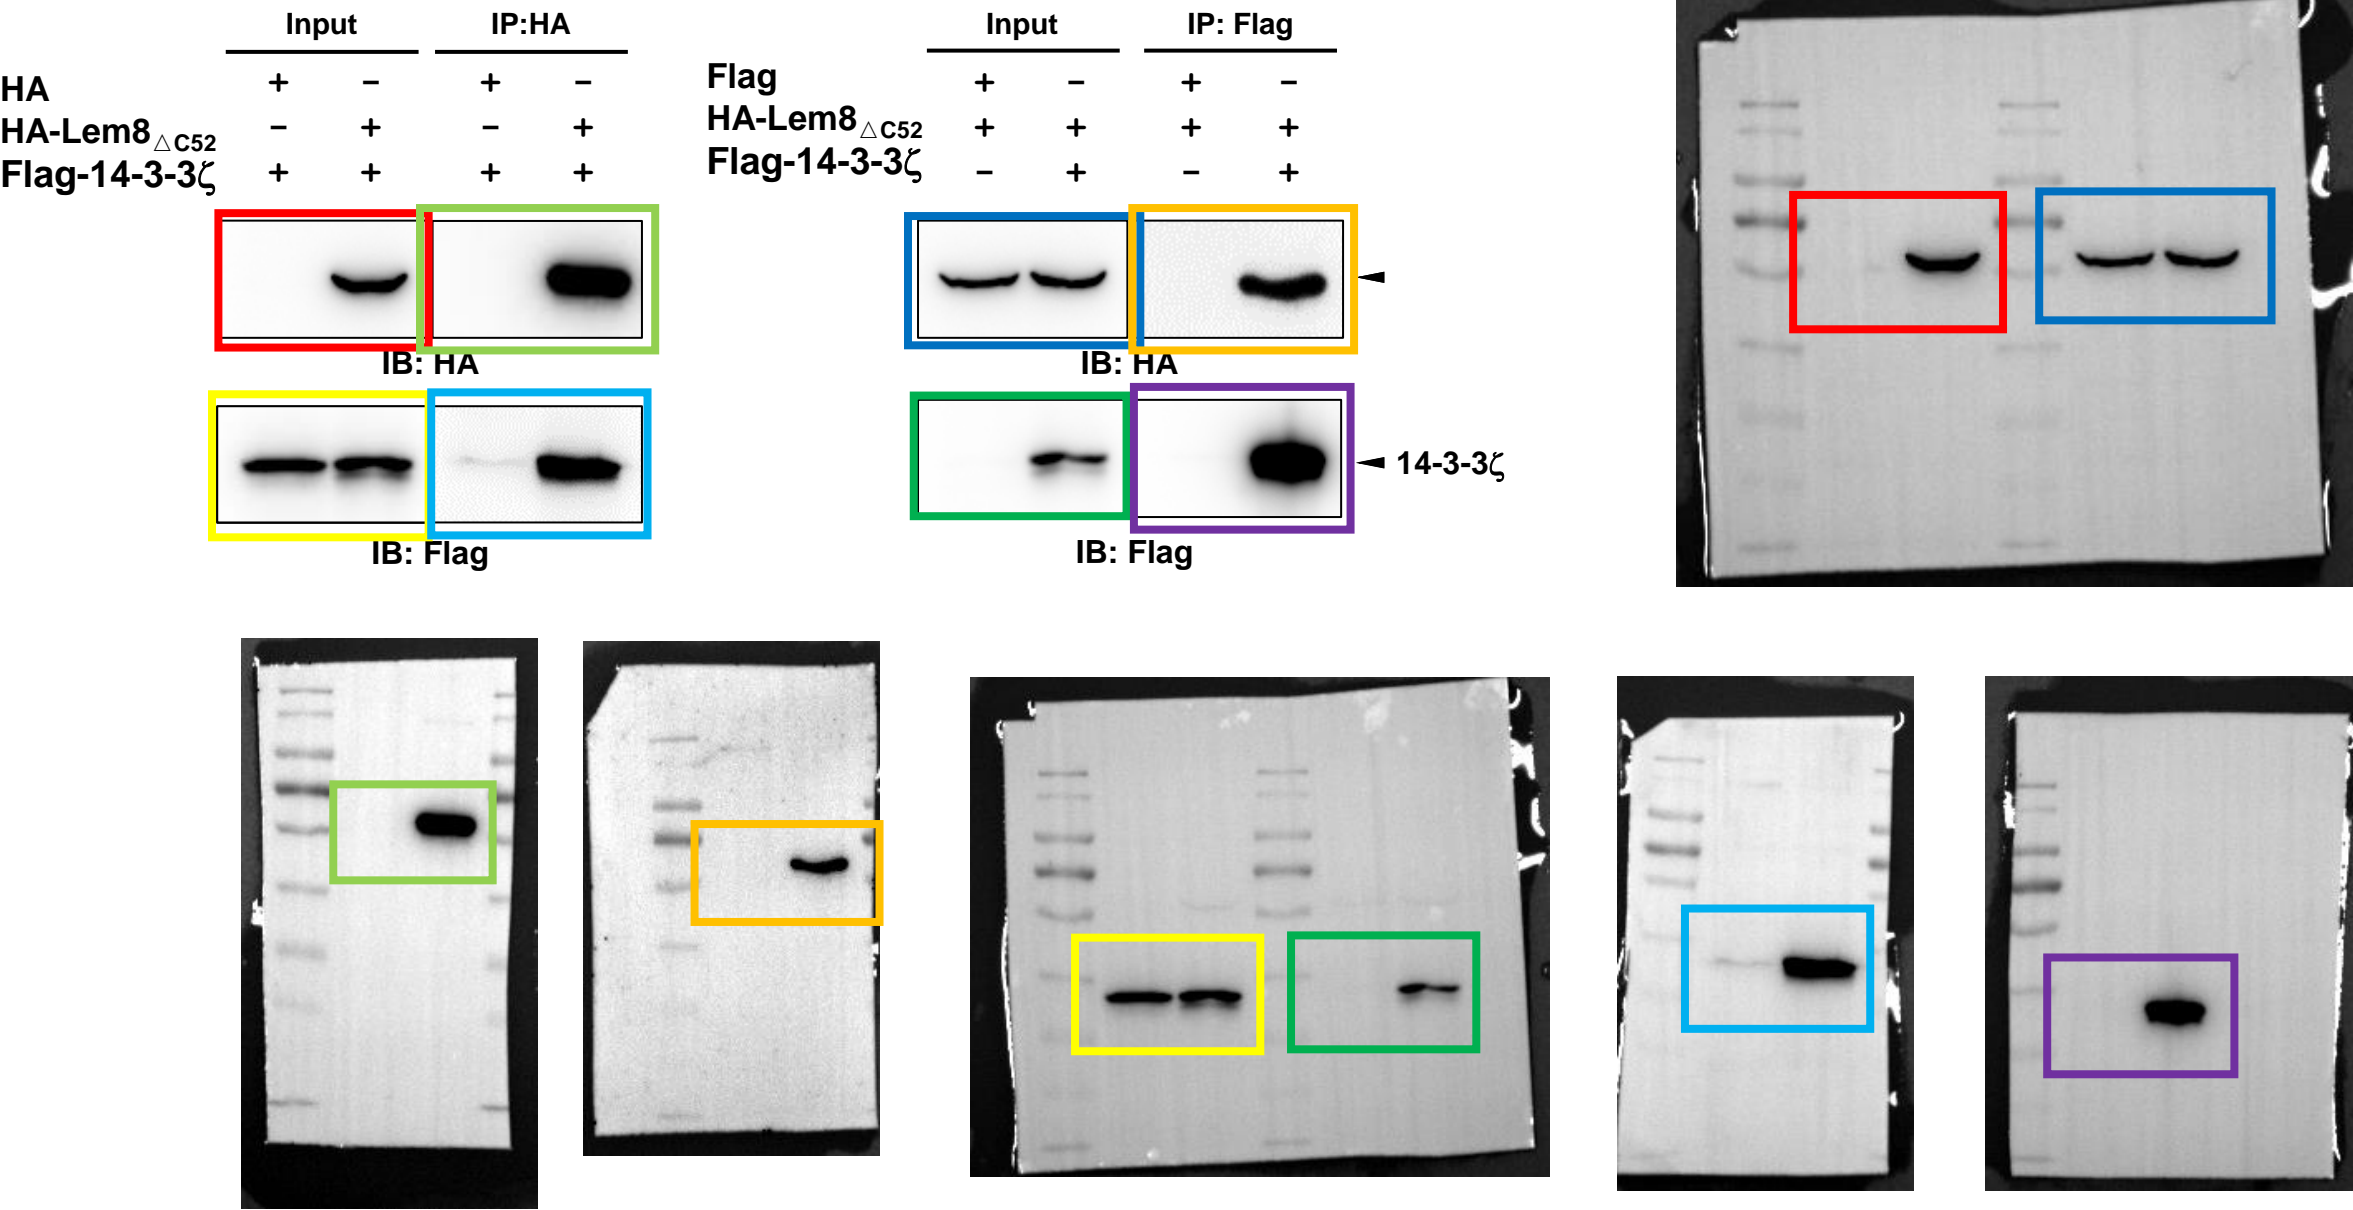

Figure 6-source data 4

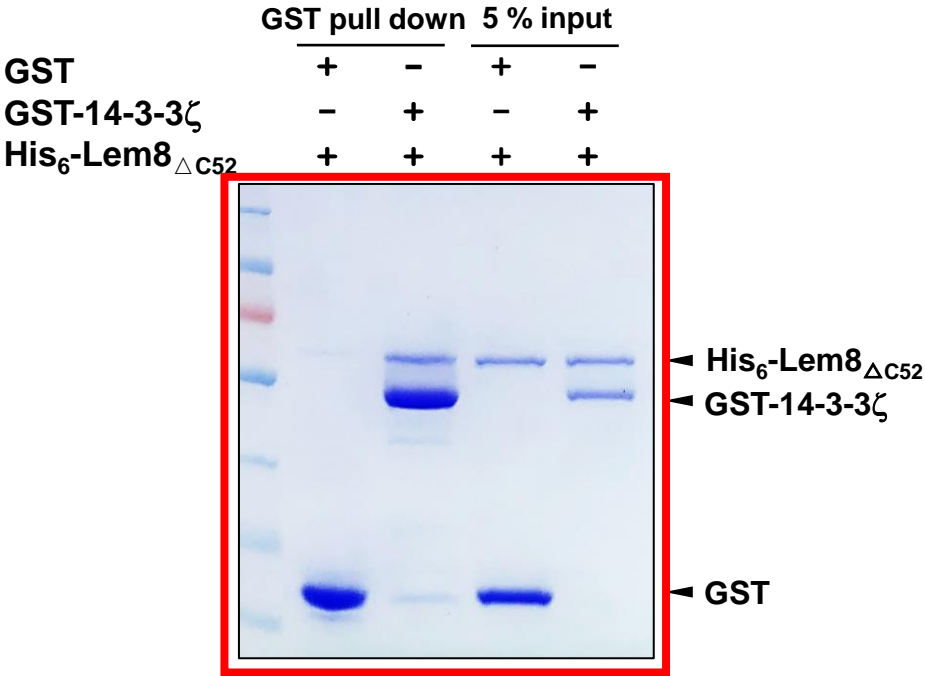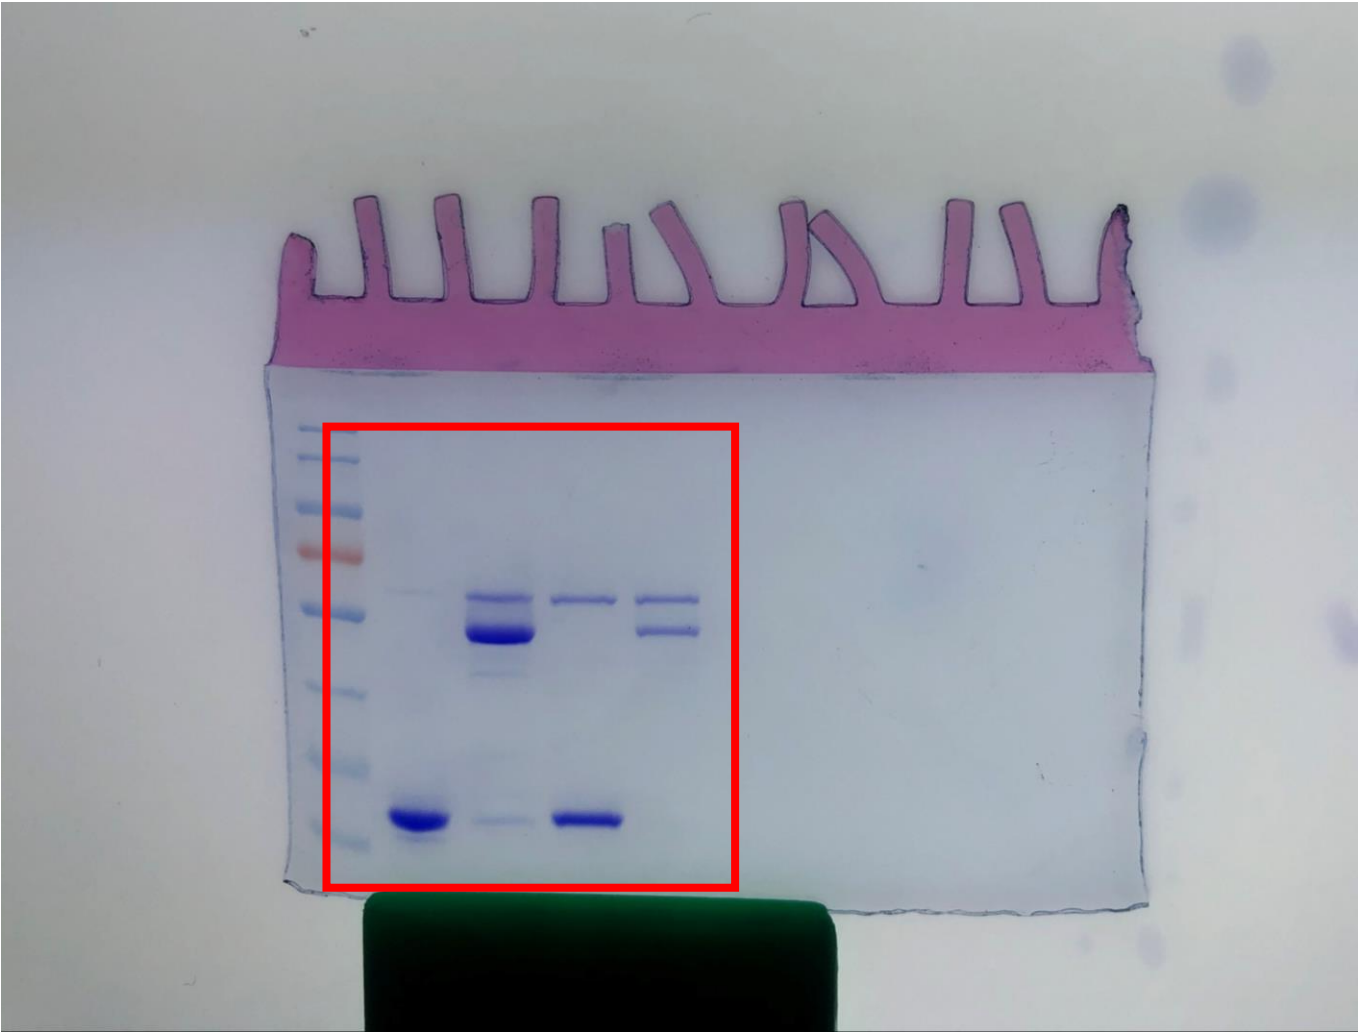

Figure 6-source data 5

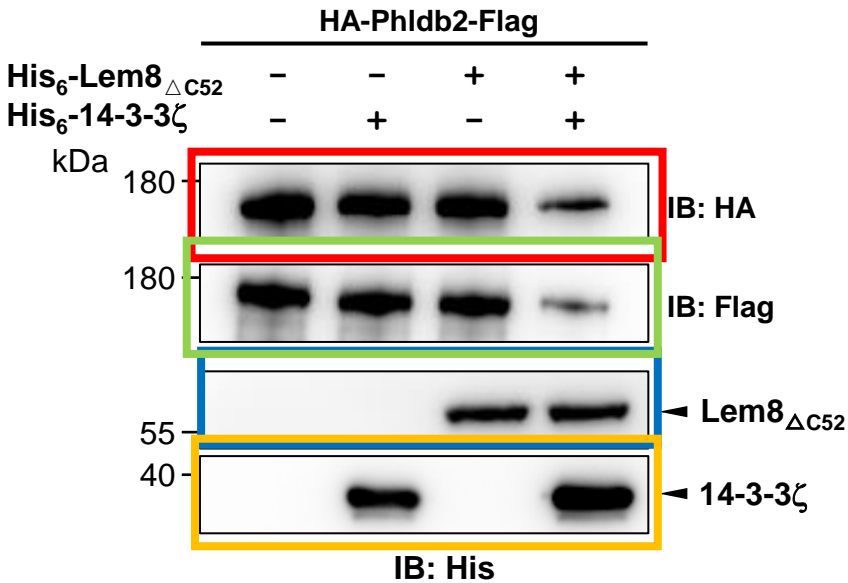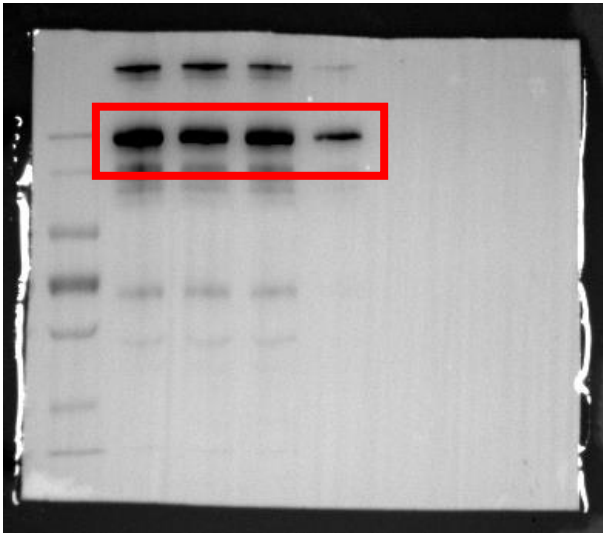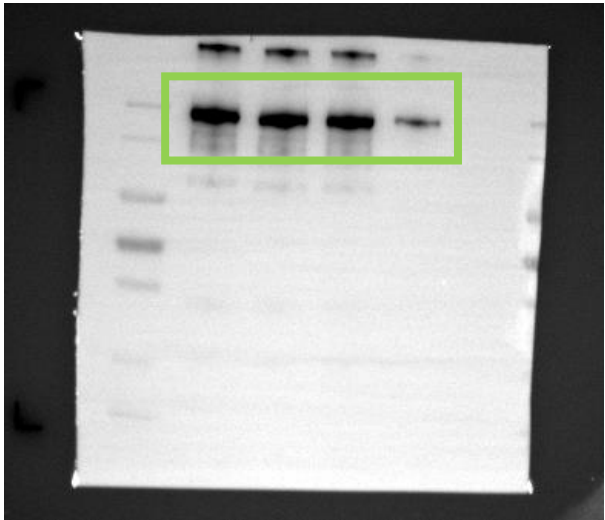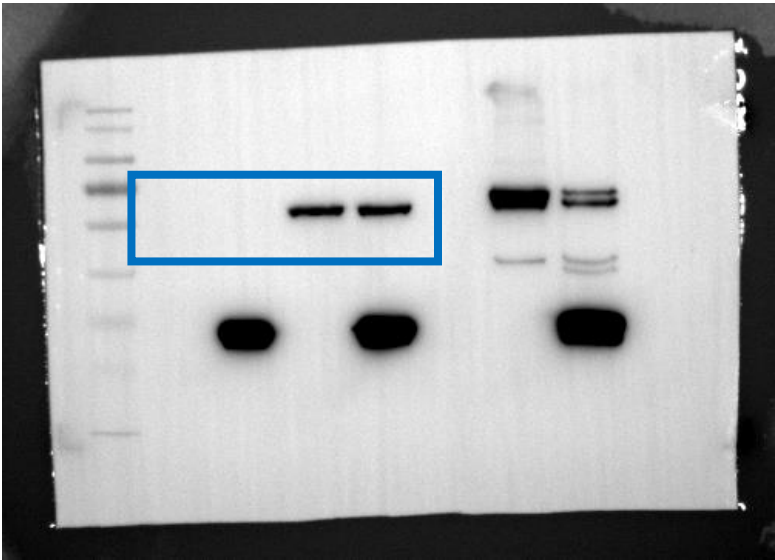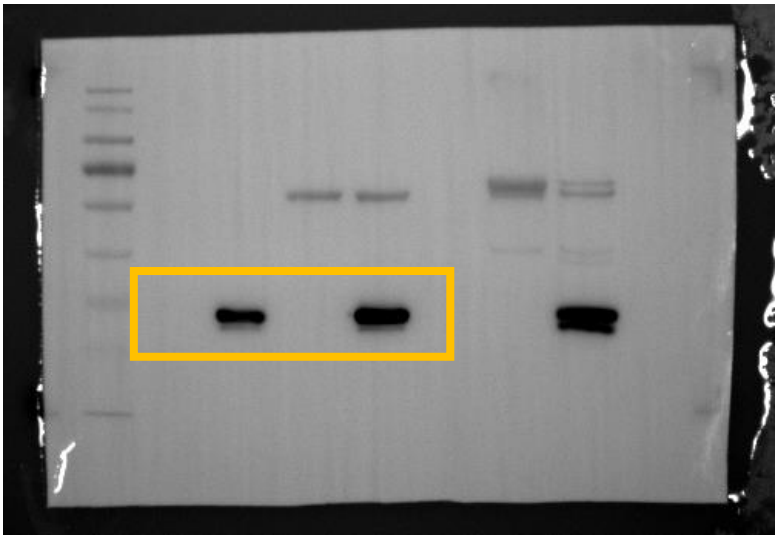

Figure 7-source data 1

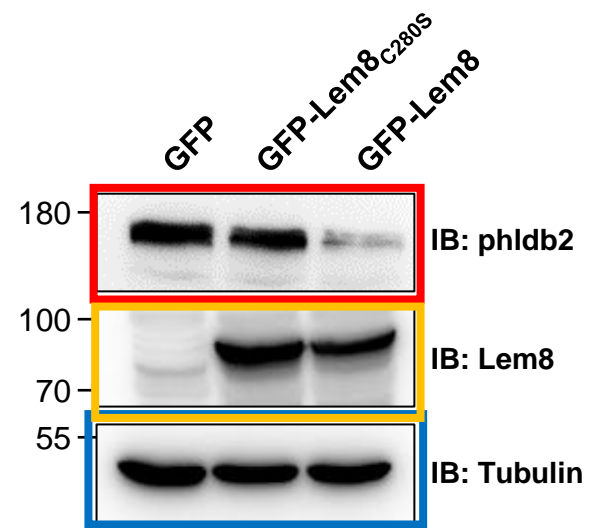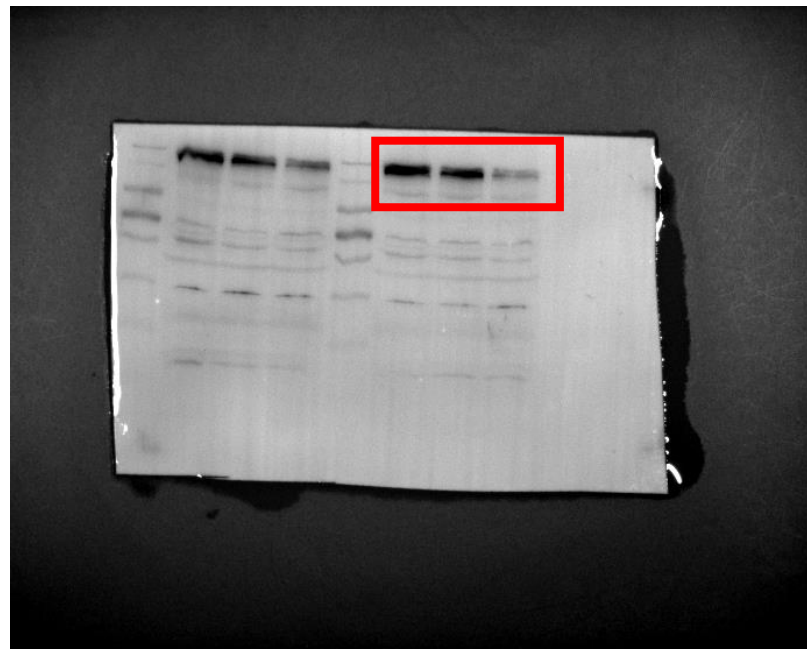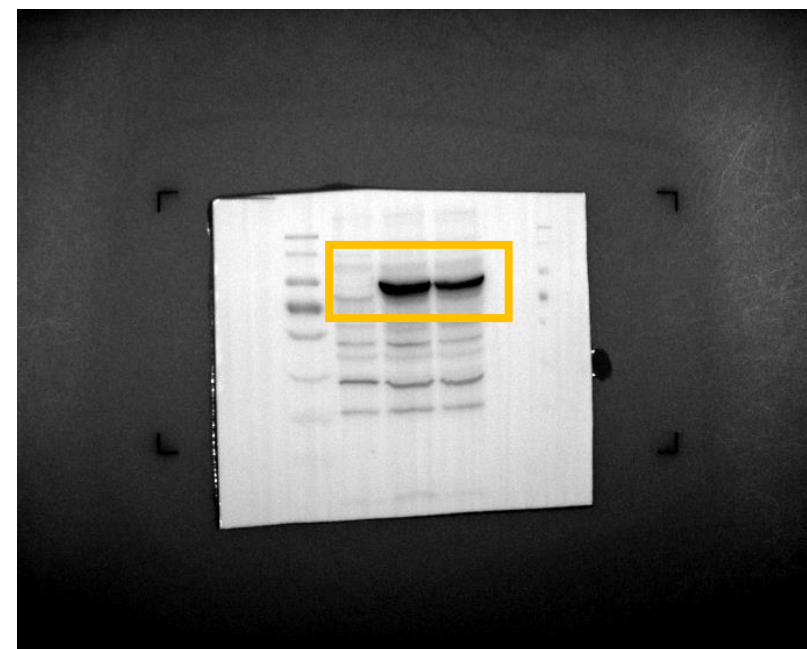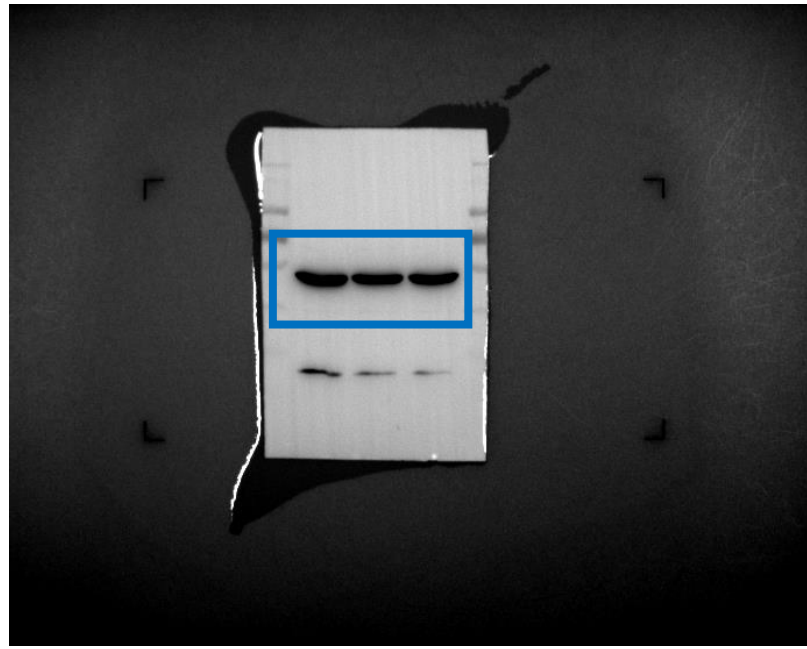

Figure 7-figure supplement 1-source data 1

**A**

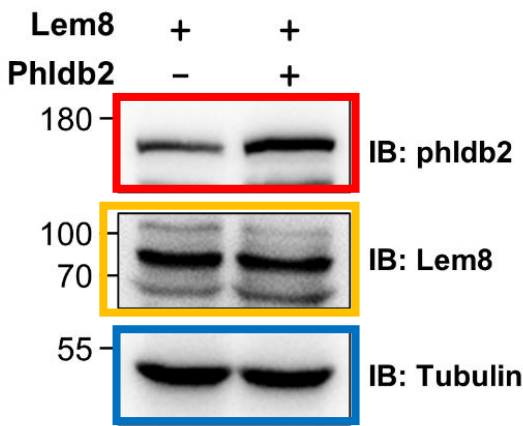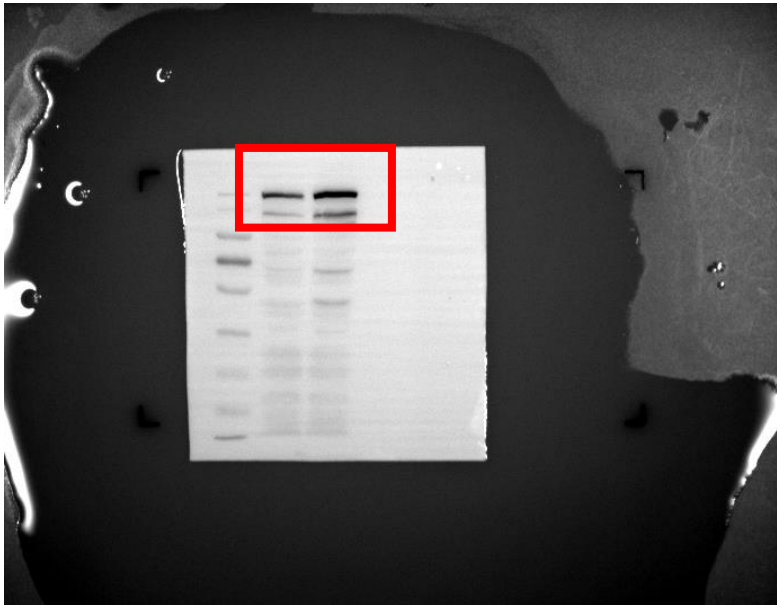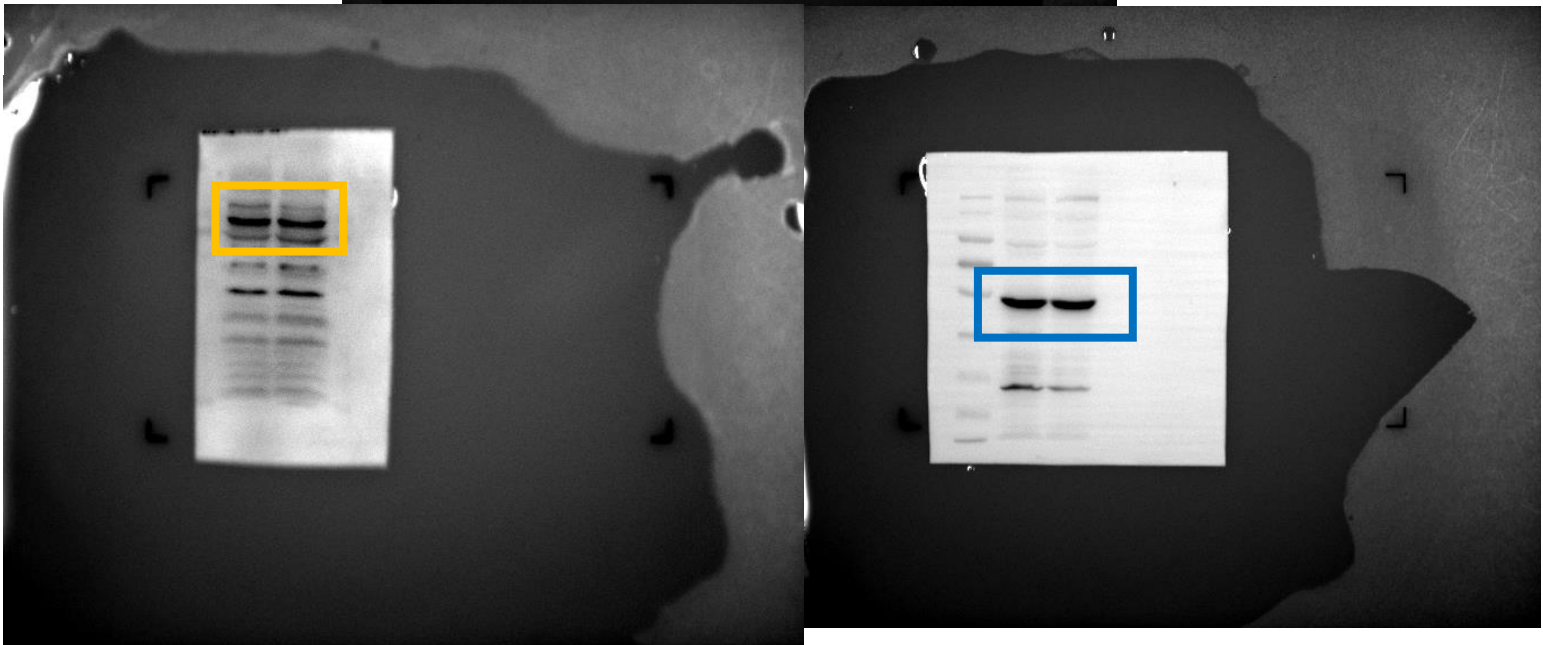

Supplement: supp [file elife-73220-supp-v1.zip]
