# Supplementary material for: Legionella pneumophila regulates host cell motility by targeting Phldb2 with a 14-3-3ζ-dependent protease effector
Source: eLife journal article supplement (doi:10.7554/elife.73220), 2022-02-17
Supplement: supp [file Figure 1-figure supplement 2-B numerical data.xlsx]

## Sheet: Sheet1
	WT			dotA-			Δlem8
2h	1.225	1	0.775	1.08108	0.891892	1	1.45	0.8	1
24h	8.5	8.75	8.75	0.324324	0.405405	0.459459	14.5	12	11
48h	100	80	75	0.027027	0.027027	0.027027	165	120	110
72h	1150	1300	1450	0	0	0	1500	1050	1050
