# Supplementary material for: Legionella pneumophila regulates host cell motility by targeting Phldb2 with a 14-3-3ζ-dependent protease effector
Source: eLife journal article supplement (doi:10.7554/elife.73220), 2022-02-17
Supplement: supp [file Figure 1-figure supplement 2-C numerical data.xlsx]

## Sheet: Sheet1
	WT			dotA-			ΔLem8
2h	1.0814	0.790698	1	1.06098	1	0.780488	1	0.692308	1.0641
24h	8.72093	13.1395	7.7907	0.536585	0.439024	0.256098	6.92308	4.23077	9.48718
48h	153.488	187.209	105.814	0.158537	0.146341	0.085366	150	143.59	93.5897
72h	662.791	569.767	441.861	0.012195	0.02439	0.02439	525.641	397.436	320.513
