# Supplementary material for: Legionella pneumophila regulates host cell motility by targeting Phldb2 with a 14-3-3ζ-dependent protease effector
Source: eLife journal article supplement (doi:10.7554/elife.73220), 2022-02-17
Supplement: supp [file Figure 2-source data 2 legend.docx]

**C.** Lem8 directly interacts with 14-3-3ζ. GST-14-3-3ζ was incubated with His6-Lem8 or His6-Lem8C280S, and the potential protein complex was captured by glutathione beads for 1 h at 4°C. After extensive washing, bound proteins were solublized with SDS loading buffer, and proteins were detected by Coomassie brilliant blue staining after being resolved by SDS/PAGE.
