# Supplementary material for: Legionella pneumophila regulates host cell motility by targeting Phldb2 with a 14-3-3ζ-dependent protease effector
Source: eLife journal article supplement (doi:10.7554/elife.73220), 2022-02-17
Supplement: supp [file Figure 3-figure supplement 1-source data 3 legend.docx]

**Fig. 3-figure supplement 1 Identification of the self-cleavage sites of Lem8**.

**C.** The self-cleavage site of the 4A mutant. Protein bands from stained SDS-PAGE gels were excised and analyzed similarly as described in A. The tryptic fragment A468PQPTPAAAAQSLSAETER487- was detected only in samples prepared from the cleaved protein but not full-length protein. Identical results were obtained in multiple samples analyzed by two different mass spectromentry facilities.
