# Supplementary material for: Legionella pneumophila regulates host cell motility by targeting Phldb2 with a 14-3-3ζ-dependent protease effector
Source: eLife journal article supplement (doi:10.7554/elife.73220), 2022-02-17
Supplement: supp [file Figure 3-source data 1 legend.docx]

**A.** Self-processing of Lem8 requires 14-3-3ζ. His6-Lem8 or His6-Lem8C280S was incubated with His6-14-3-3ζ for 2 h, proteins resolved by SDS-PAGE were detected by Coomassie brilliant blue staining. The cysteine protease inhibitor E64 was added to the indicated samples.
