# Supplementary material for: Legionella pneumophila regulates host cell motility by targeting Phldb2 with a 14-3-3ζ-dependent protease effector
Source: eLife journal article supplement (doi:10.7554/elife.73220), 2022-02-17
Supplement: supp [file Figure 3-source data 2 legend.docx]

**B.** The 14-3-3 protein from *D. discoideum* induces the self-cleavage of Lem8. His6-Lem8 was incubated with GST-14-3-3ζ or GST-14-3-3Dd for the indicated time and the mixtures separated by SDS-PAGE were detected by immunoblotting with antibodies specific for Lem8 and GST, respectively.
