# Supplementary material for: Legionella pneumophila regulates host cell motility by targeting Phldb2 with a 14-3-3ζ-dependent protease effector
Source: eLife journal article supplement (doi:10.7554/elife.73220), 2022-02-17
Supplement: supp [file Figure 3-source data 3 legend.docx]

**C.** Determination of the self-cleavage site of Lem8. His6-Lem8 was incubated with His6-14-3-3ζ for 16 h, proteins were resolved by SDS-PAGE, stained with Coomassie brilliant blue. Protein bands corresponding to full-length and cleaved Lem8 band was excised, digested with trypsin and analyzed by mass spectrometry. The detection of the semi-tryptic peptide -L464CEKAPQPTPQRQ476- in cleaved samples suggested that the cleavage site lies between Gln476 and Arg477.
