# Supplementary material for: Legionella pneumophila regulates host cell motility by targeting Phldb2 with a 14-3-3ζ-dependent protease effector
Source: eLife journal article supplement (doi:10.7554/elife.73220), 2022-02-17
Supplement: supp [file Figure 4-D numerical data.xlsx]

## Sheet: Sheet1
WT	C280S	H391A	D412A
10	100	80	80
0	90	90	80
20	100	90	90
10	80	100	90
20	80	100	100
0	80	90	90
