# Supplementary material for: Legionella pneumophila regulates host cell motility by targeting Phldb2 with a 14-3-3ζ-dependent protease effector
Source: eLife journal article supplement (doi:10.7554/elife.73220), 2022-02-17
Supplement: supp [file Figure 4-figure supplement 1-B numerical data.xlsx]

## Sheet: Sheet1
Lem8C280S	Lem8
13	87
5	83
17	91
11	77
7	92
9	68
