# Supplementary material for: Legionella pneumophila regulates host cell motility by targeting Phldb2 with a 14-3-3ζ-dependent protease effector
Source: eLife journal article supplement (doi:10.7554/elife.73220), 2022-02-17
Supplement: supp [file Figure 4-figure supplement 1-source data 3 legend.docx]

**Figure 4-figure supplement 1 Verification of Lem8-mediated cleavage of candidate proteins and its cleavage of phldb2 at multiple sites**

**C.** Mutations were introduced into HA-Phldb2-Flag to replace residues Arg1111 and Gln1112 (Phldb2AA1) or Gln1112 and Arg1113 (Phldb2AA2) with alanine, respectively. The two mutants were co-expressed in HEK293T cells with Lem8 or Lem8C280S. Samples were resolved with SDS-PAGE, and probed by immunoblotting with the antibody specific to HA and Flag, respectively.
