# Supplementary material for: Legionella pneumophila regulates host cell motility by targeting Phldb2 with a 14-3-3ζ-dependent protease effector
Source: eLife journal article supplement (doi:10.7554/elife.73220), 2022-02-17
Supplement: supp [file Figure 5-source data 1 legend.docx]

**B.** The predicted coiled coil motif is critical for Lem8-mediated yeast toxicity. Yeast cells inducibly expressing Lem8 or mutant Lem8GG were serially diluted and spotted onto the indicated media for 48 h (top panel). The expression of Lem8 and Lem8GG was examined and PGK1 was probed as a loading control (lower panel).
