# Supplementary material for: Legionella pneumophila regulates host cell motility by targeting Phldb2 with a 14-3-3ζ-dependent protease effector
Source: eLife journal article supplement (doi:10.7554/elife.73220), 2022-02-17
Supplement: supp [file Figure 5-source data 2 legend.docx]

**C.** Lem8GG loses the capacity to cleave Phldb2 in mammalian cells. Lysates of HEK293T cells expressing Lem8 or Lem8GG were resolved by SDS-PAGE and detected by immunoblotting with antibodies specific for Phldb2 and Lem8, respectively. Tubulin was used as a loading control. Results shown were one representative from three independent experiments with similar results.
