# Supplementary material for: Legionella pneumophila regulates host cell motility by targeting Phldb2 with a 14-3-3ζ-dependent protease effector
Source: eLife journal article supplement (doi:10.7554/elife.73220), 2022-02-17
Supplement: supp [file Figure 6-B numerical data.xlsx]

## Sheet: Sheet1
No infection	WT	dotA-	Δlem8	Δlem8(pLem8)	Δlem8(pLem8C280S)	Δlem8(pLem8GG)
48.4	28.2	45.4	39.8	19.4	47.5	44.8
54.3	24.4	42.4	37.2	27.2	49.4	39.3
43.7	18.9	46.8	41.5	17.6	41.2	36.7
