# Supplementary material for: Legionella pneumophila regulates host cell motility by targeting Phldb2 with a 14-3-3ζ-dependent protease effector
Source: eLife journal article supplement (doi:10.7554/elife.73220), 2022-02-17
Supplement: supp [file Figure 6-B numerical data.xlsx]

## Sheet: Sheet1
ΔN25	ΔC52	ΔC100
90	10	90
90	10	80
80	0	80
90	0	90
100	10	100
100	0	90
