# Supplementary material for: Legionella pneumophila regulates host cell motility by targeting Phldb2 with a 14-3-3ζ-dependent protease effector
Source: eLife journal article supplement (doi:10.7554/elife.73220), 2022-02-17
Supplement: supp [file Figure 6-source data 4 legend.docx]

**D.** Lem8△C52 directly interacts with 14-3-3ζ. Mixtures containing GST-14-3-3ζ and His6-Lem8△C52 were incubated with glutathione beads for 1 h at 4°C. After washing, samples resolved by SDS/PAGE were detected by Coomassie brilliant blue staining.
