# Supplementary material for: Legionella pneumophila regulates host cell motility by targeting Phldb2 with a 14-3-3ζ-dependent protease effector
Source: eLife journal article supplement (doi:10.7554/elife.73220), 2022-02-17
Supplement: supp [file Figure 6-source data 5 legend.docx]

**E.** The cleavage ofPhldb2 by Lem8△C52 requires 14-3-3ζ. Purified HA-Phldb2-Flag from HEK293T was incubated with His6-Lem8△C52 in reactions with or without His6-14-3-3ζ. Total proteins of all samples were resolved with SDS-PAGE, and probed by immunoblotting with antibody specific for HA, Flag and His6, respectively.
