# Supplementary material for: Legionella pneumophila regulates host cell motility by targeting Phldb2 with a 14-3-3ζ-dependent protease effector
Source: eLife journal article supplement (doi:10.7554/elife.73220), 2022-02-17
Supplement: supp [file Figure 7-B numerical data.xlsx]

## Sheet: Sheet1
	Vector	Lem8C280S	Lem8
24 h	48.1	45.7	26.5
48 h	61.5	67	37.6
