# Supplementary material for: Legionella pneumophila regulates host cell motility by targeting Phldb2 with a 14-3-3ζ-dependent protease effector
Source: eLife journal article supplement (doi:10.7554/elife.73220), 2022-02-17
Supplement: supp [file Figure 7-C numerical data.xlsx]

## Sheet: Sheet1
No infection	WT	dotA-	Δlem8	Δlem8(pLem8)	Δlem8(pLem8C280S)	Δlem8(pLem8GG)
56.3	35.1	43.1	44.8	22.6	47.8	47.4
48.1	32.8	44.2	53.9	24.2	52.9	44.8
46.8	26.2	46.5	50.3	31.4	51.1	51.8
