# Supplementary material for: Legionella pneumophila regulates host cell motility by targeting Phldb2 with a 14-3-3ζ-dependent protease effector
Source: eLife journal article supplement (doi:10.7554/elife.73220), 2022-02-17
Supplement: supp [file Figure 7-figure supplement 1-B numerical data.xlsx]

## Sheet: Sheet1
	Lem8 + Vector	Lem8 + Vector	Lem8 + Vector	Lem8 + Phldb2	Lem8 + Phldb2	Lem8 + Phldb2
24 h	24.3	24.1	27.6	45.7	52.3	47.3
48 h	35	33.2	38.6	54	58.2	60.3
