# Supplementary material for: Legionella pneumophila regulates host cell motility by targeting Phldb2 with a 14-3-3ζ-dependent protease effector
Source: eLife journal article supplement (doi:10.7554/elife.73220), 2022-02-17
Supplement: supp [file Figure 7-figure supplement 1-source data 2 legend.docx]

**Fig. 7-figure supplement 1 Overexpression of Phldb2 suppressed the inhibitory effects of Lem8 on cell migration**

**B.** Wound-healing scratch assay of cells expressing Phldb2. 18 h after transfection, monolayers were scratched using a pipette tip. Images of the wounds were captured at 2 h, 24 h and 48 h, respectively. Results shown were from a representative of three independent experiments from which the quantitation of wound healing was obtained by Image J (right panel).
