# Supplementary material for: Legionella pneumophila regulates host cell motility by targeting Phldb2 with a 14-3-3ζ-dependent protease effector
Source: eLife journal article supplement (doi:10.7554/elife.73220), 2022-02-17
Supplement: supp [file Figure 7-source data 2 legend.docx]

**B.** Wound-healing scratch assay of the three stable cell lines. The three cell lines were individually seeded into 6 well plates. When reached confluency, cell monolayer of each cell lines was scratched using a pipette tip. Images of the wounds were captured at 2 h, 24 h and 48 h after making the scratches using an Olympus IX-83 fluorescence microscope. Images of a representative experiment were shown (left panel). The wound healing rates from three independent experiments was quantitated by Image J (right panel).
